# Supplementary material for: Degradation of NTO induced by superoxide and hydroperoxyl radicals: a comprehensive DFT study
Source: Royal Society of Chemistry journal article supplement (doi:10.1039/d3cp05603a), 2023-11-29
Supplement: d3cp05603a1.pdf [file d3cp05603a1.pdf]

## Supplementary Information

### Degradation of NTO induced by superoxide and hydroperoxyl radical: Comprehensive DFT study

Liudmyla K. Sviatenko,<sup>a</sup> Leonid Gorb,<sup>b,c</sup> and Jerzy Leszczynski<sup>\*,a</sup>

<sup>a</sup>Interdisciplinary Center for Nanotoxicity, Department of Chemistry, Physics & Atmospheric Sciences, Jackson State University, Jackson, Mississippi, 39217, USA

<sup>b</sup>Institute of Molecular Biology and Genetics, NAS of Ukraine, 150 Zabolotny Str., Kyiv, 03143, Ukraine

<sup>c</sup>QSAR Lab Sp. z o.o. Trzy Lipy 3, B, Gdańsk, 80-172, Poland

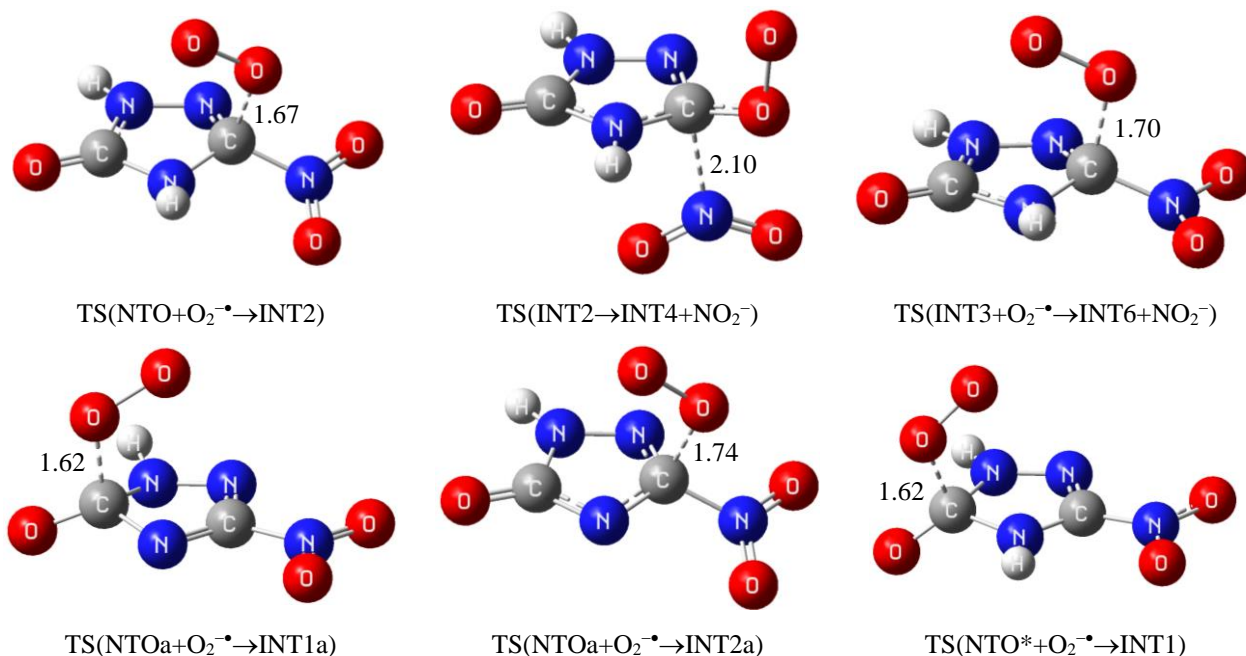

**Figure S1.** PCM(Pauling)/M06-2X/6-311++G(d,p) optimized structures of transition states for NTO and NTOa decomposition in water under action of superoxide (O<sub>2</sub><sup>•-</sup>) with selected interatomic distances in Å. Color for atoms: grey – carbon, light grey – hydrogen, blue – nitrogen, red – oxygen.

Continue Figure S1

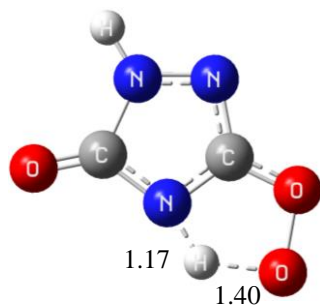

TS(INT4→INT7)

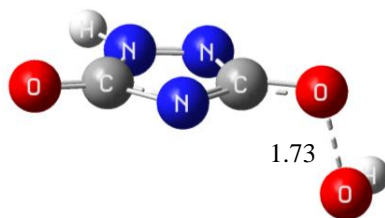TS(INT7→INT8+OH<sup>\*</sup>)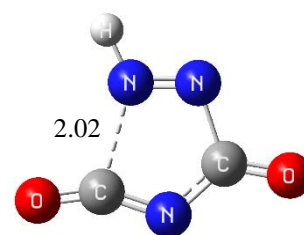

TS(INT8→INT9)

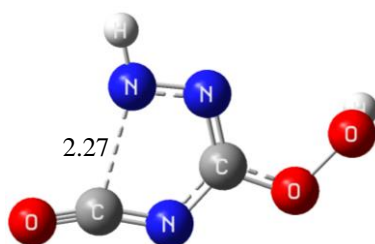

TS(INT7→INT10)

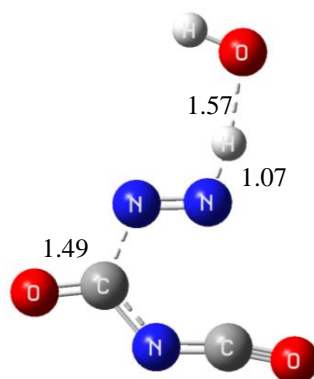TS(INT9+OH<sup>\*</sup>→INT11+N<sub>2</sub>+H<sub>2</sub>O)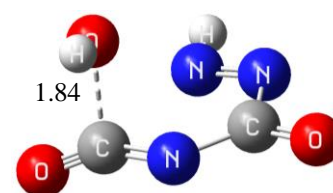TS(INT9+OH<sup>\*</sup>→INT12)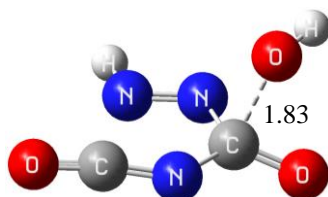TS(INT9+OH<sup>\*</sup>→INT13)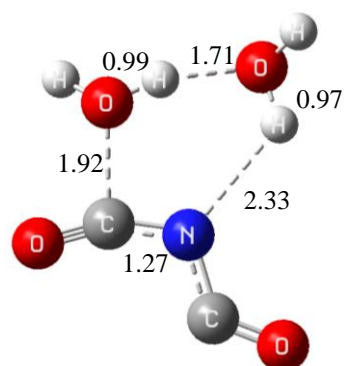TS(INT11+H<sub>2</sub>O→INT14)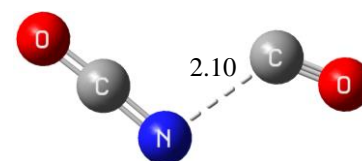

TS(INT11→INT15+CO)

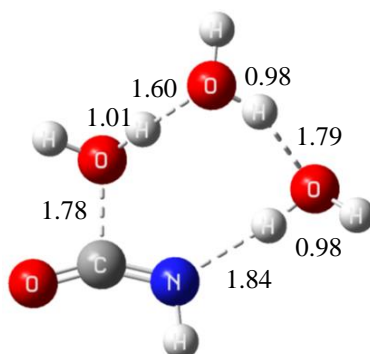TS(INT16+H<sub>2</sub>O→INT17)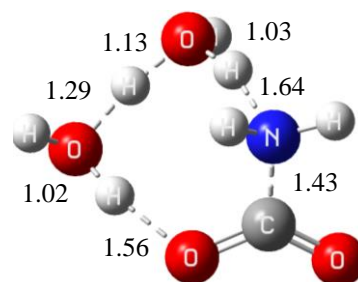TS(INT17→NH<sub>3</sub>+CO<sub>2</sub>)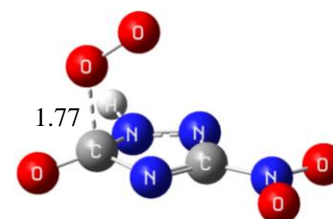TS(NTOa<sup>\*</sup>+O<sub>2</sub><sup>-\*</sup>→INT1a)

Continue Figure S1

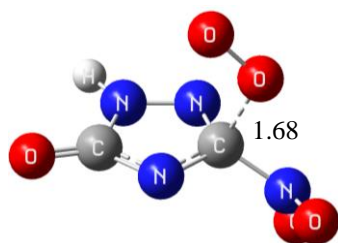 $\text{TS}(\text{INT0a}^* + \text{O}_2^{\bullet-} \rightarrow \text{INT2a})$ 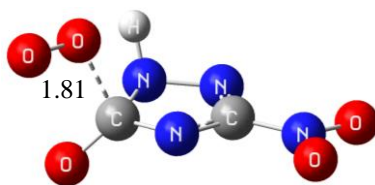 $\text{TS}(\text{INT3a} + \text{O}_2^{\bullet-} \rightarrow \text{INT5a})$ 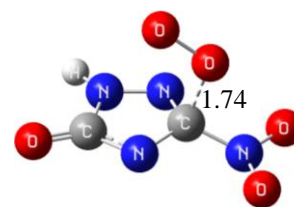 $\text{TS}(\text{INT3a} + \text{O}_2^{\bullet-} \rightarrow \text{INT6a} + \text{NO}_2^-)$ 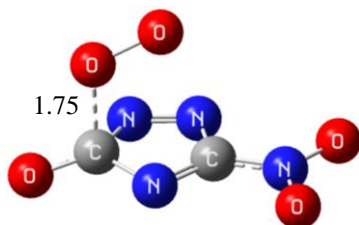 $\text{TS}(\text{INT4a} + \text{O}_2^{\bullet-} \rightarrow \text{INT7a})$ 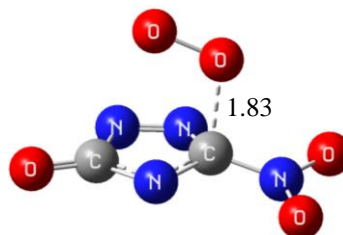 $\text{TS}(\text{INT4a} + \text{O}_2^{\bullet-} \rightarrow \text{INT8a})$

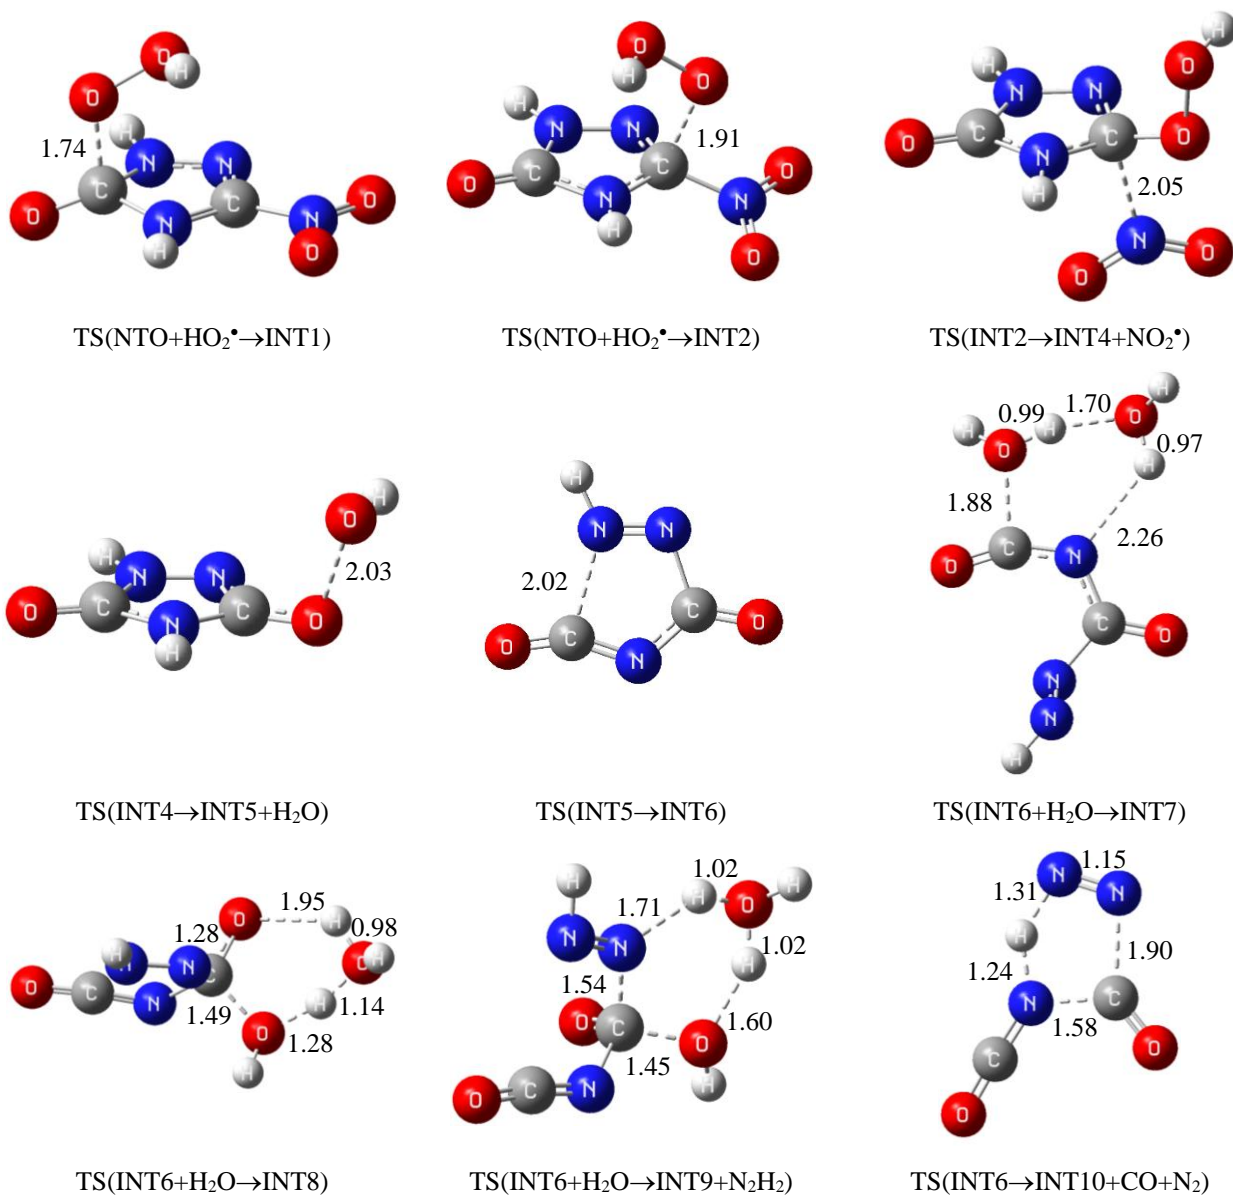

**Figure S2.** PCM(Pauling)/M06-2X/6-311++G(d,p) optimized structures of transition states for NTO and NTOa decomposition in water under action of hydroperoxyl radical ( $\text{HO}_2^\bullet$ ) with selected interatomic distances in Å. Color for atoms: grey – carbon, light grey – hydrogen, blue – nitrogen, red – oxygen.

Continue Figure S2

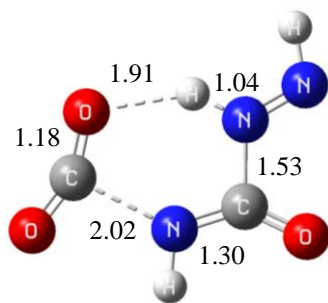TS(INT7→INT11+CO<sub>2</sub>)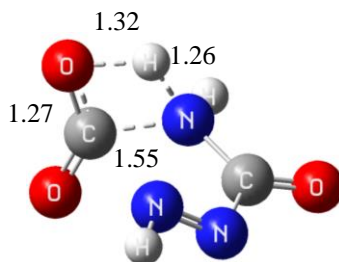TS(INT7→INT12+CO<sub>2</sub>)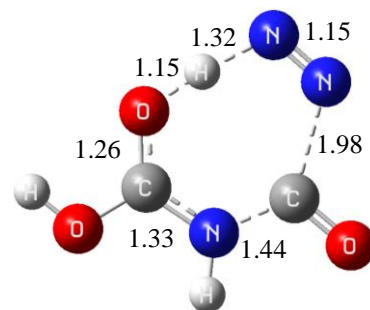TS(INT7→INT13+CO+N<sub>2</sub>)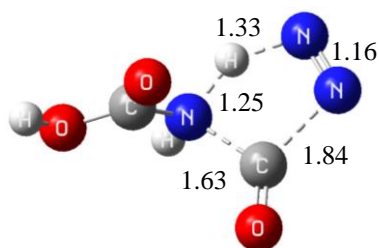TS(INT7→INT14+CO+N<sub>2</sub>)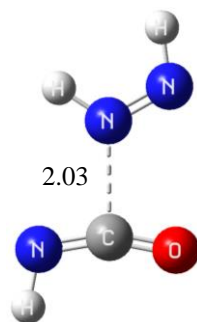TS(INT11→INT10+N<sub>2</sub>H<sub>2</sub>)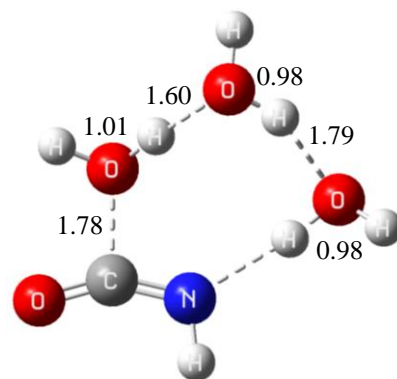TS(INT10+H<sub>2</sub>O→INT14)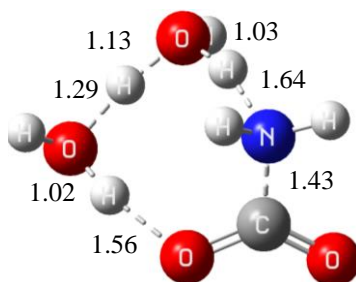TS(INT14→NH<sub>3</sub>+CO<sub>2</sub>)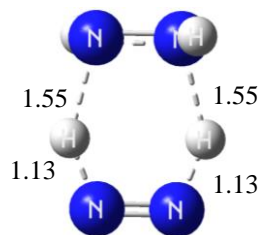TS(N<sub>2</sub>H<sub>2</sub>→N<sub>2</sub>H<sub>4</sub>+N<sub>2</sub>)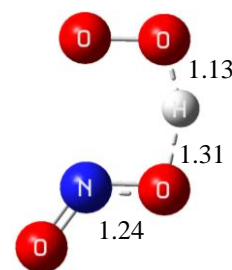TS(NO<sub>2</sub><sup>\*</sup>+HO<sub>2</sub><sup>\*</sup>→HNO<sub>2</sub>+O<sub>2</sub>)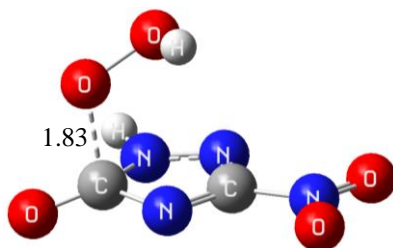TS(NTOa+HO<sub>2</sub><sup>\*</sup>→INT1a)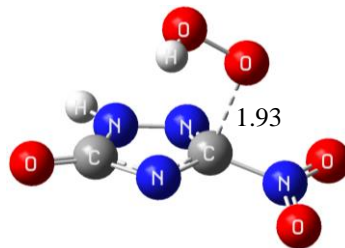TS(NTOa+HO<sub>2</sub><sup>\*</sup>→INT2a)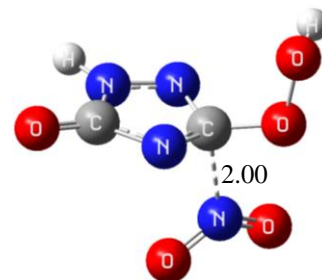TS(INT2a→INT4a+NO<sub>2</sub><sup>-</sup>)

Continue Figure S2

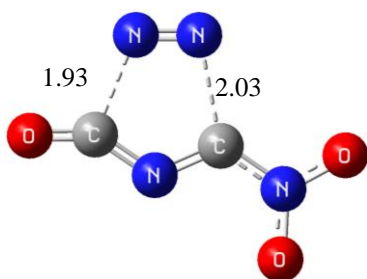TS(INT3a→INT5a+N<sub>2</sub>)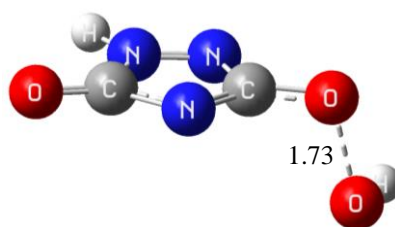TS(INT4a→INT5+OH<sup>\*</sup>)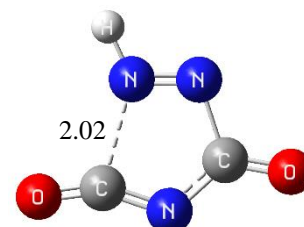

TS(INT5→INT6)

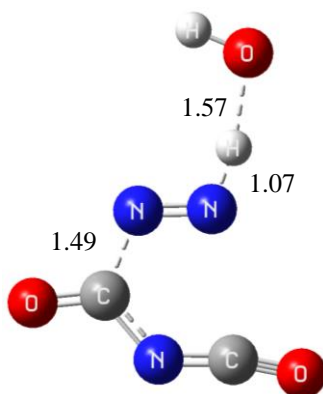TS(INT6+OH<sup>\*</sup>→INT6a+N<sub>2</sub>+H<sub>2</sub>O)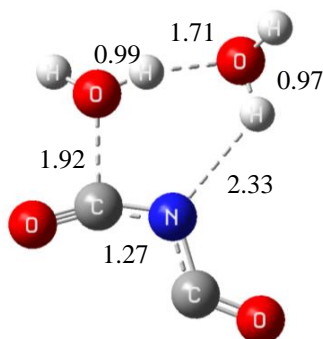TS(INT6a+H<sub>2</sub>O→INT7a)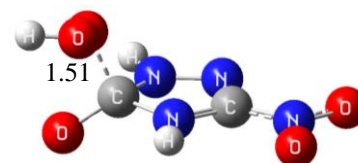TS(NTO<sup>\*</sup>+HO<sub>2</sub><sup>\*</sup>→INT1)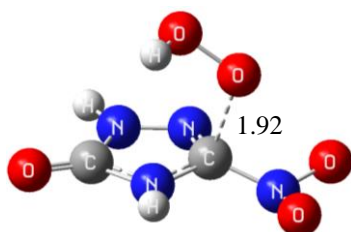TS(NTO<sup>\*</sup>+HO<sub>2</sub><sup>\*</sup>→INT2)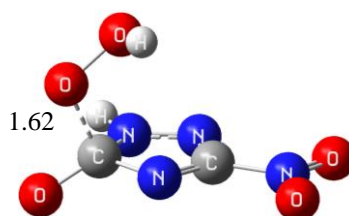TS(NTOr+HO<sub>2</sub><sup>\*</sup>→INT15)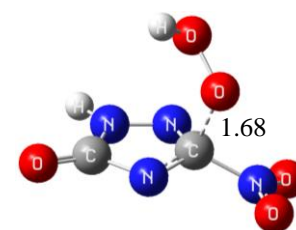TS(NTOr+HO<sub>2</sub><sup>\*</sup>→INT16)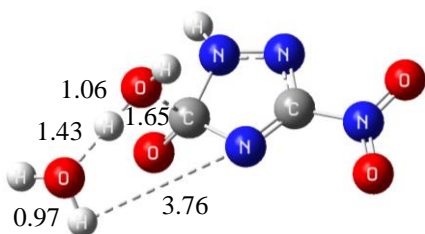TS(NTOr+H<sub>2</sub>O→INT17)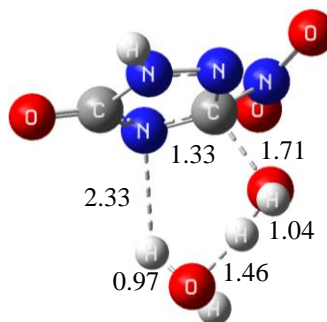TS(NTOr+H<sub>2</sub>O→INT18)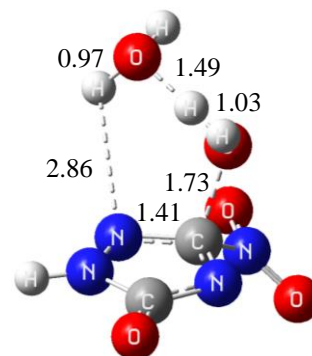TS(NTOr+H<sub>2</sub>O→INT19)



Continue Figure S2

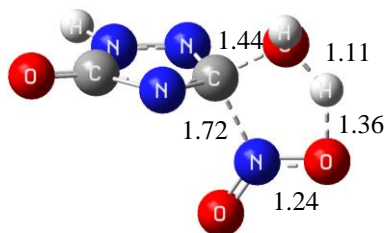TS(NTOr+H<sub>2</sub>O→INT20+HNO<sub>2</sub>)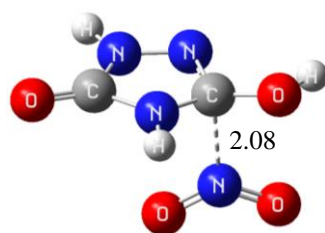TS(INT18→INT21+NO<sub>2</sub><sup>\*</sup>)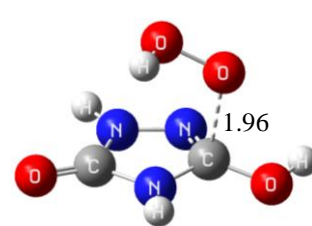TS(INT21+HO<sub>2</sub><sup>\*</sup>→INT23)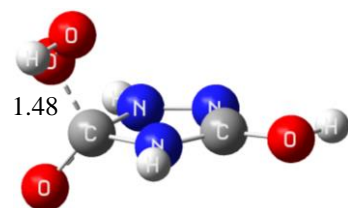TS(INT21+HO<sub>2</sub><sup>\*</sup>→INT24)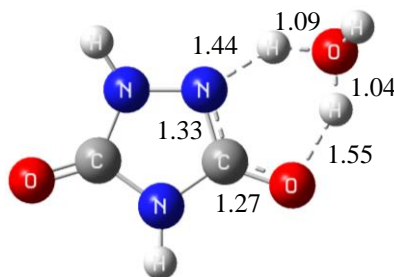

TS(INT21→INT25)

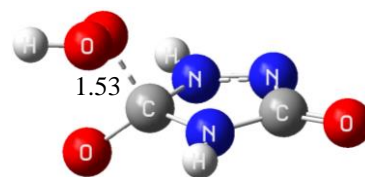TS(INT22+HO<sub>2</sub><sup>\*</sup>→INT26)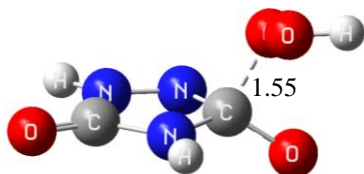TS(INT22+HO<sub>2</sub><sup>\*</sup>→INT27)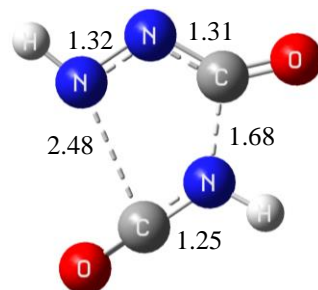

TS(INT22→INT10+INT28)

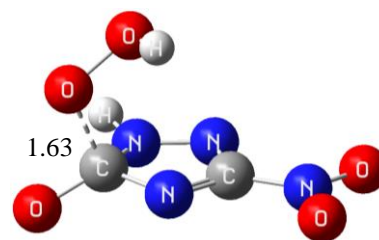TS(NTOa<sup>\*</sup>+HO<sub>2</sub><sup>\*</sup>→INT1a)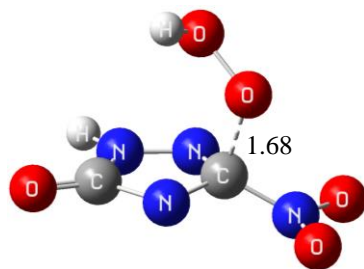TS(NTOa<sup>\*</sup>+HO<sub>2</sub><sup>\*</sup>→INT2a)

## Cartesian coordinates for optimized local minima and transition states species

### Superoxide induced degradation of NTO and NTOa

#### NTO

|   |             |             |             |
|---|-------------|-------------|-------------|
| N | -0.12666700 | 1.32311000  | -0.00010500 |
| C | 0.36226000  | 0.13534300  | -0.00006400 |
| N | -1.45970700 | 1.10938500  | 0.00015700  |
| C | -1.80641500 | -0.22101300 | -0.00023200 |
| N | -0.57239800 | -0.84500400 | -0.00001900 |
| H | -0.41365700 | -1.84430400 | 0.00016100  |
| H | -2.10256000 | 1.88985600  | 0.00045900  |
| O | -2.91770500 | -0.72084900 | 0.00004300  |
| N | 1.78328300  | -0.13448200 | 0.00003200  |
| O | 2.53711800  | 0.81007700  | -0.00002600 |
| O | 2.10678200  | -1.30205200 | 0.00007100  |

#### O<sub>2</sub><sup>-•</sup>

|   |            |            |             |
|---|------------|------------|-------------|
| O | 0.00000000 | 0.00000000 | 0.65872000  |
| O | 0.00000000 | 0.00000000 | -0.65872000 |

#### H<sub>2</sub>O

|   |            |             |             |
|---|------------|-------------|-------------|
| H | 0.00000000 | 0.76115400  | -0.47140900 |
| O | 0.00000000 | 0.00000000  | 0.11785200  |
| H | 0.00000000 | -0.76115400 | -0.47140900 |

#### dimer H<sub>2</sub>O

|   |             |             |             |
|---|-------------|-------------|-------------|
| H | 1.80326700  | 0.77067100  | 0.22496900  |
| O | 1.48240400  | -0.10266100 | -0.01842500 |
| H | 0.51258200  | -0.02675700 | -0.01326300 |
| H | -1.73867200 | 0.83042600  | 0.14811000  |
| O | -1.33458800 | -0.01171600 | -0.08722600 |
| H | -1.75969700 | -0.65932800 | 0.48539400  |

#### INT1

|   |             |             |             |
|---|-------------|-------------|-------------|
| N | 0.34645100  | 1.38381500  | 0.02062500  |
| C | 0.78340300  | 0.12193300  | -0.07603500 |
| N | -0.92978900 | 1.30543700  | -0.12077100 |
| C | -1.51137900 | -0.10575100 | -0.48381700 |
| N | -0.11119500 | -0.78830100 | -0.28917100 |
| H | 0.07198800  | -1.77504900 | -0.43473700 |
| H | -1.47479100 | 2.16377200  | -0.14365000 |
| O | -1.97036600 | -0.18513300 | -1.65335600 |
| N | 2.21162000  | -0.15933600 | 0.02767500  |
| O | 2.94844300  | 0.76430500  | 0.27996100  |
| O | 2.54392400  | -1.30994500 | -0.14687400 |
| O | -2.35733400 | -0.51086900 | 0.50818900  |
| O | -1.77078600 | -0.34299700 | 1.82070400  |

#### TS(NTO+O<sub>2</sub><sup>-•</sup>→INT2)

|   |             |             |             |
|---|-------------|-------------|-------------|
| N | 0.10251000  | -0.18868100 | 1.38856300  |
| C | -0.35549800 | -0.05198100 | 0.12428500  |
| N | 1.44660500  | -0.29764800 | 1.19768300  |
| C | 1.79824900  | -0.52527200 | -0.11179000 |
| N | 0.58691700  | -0.51188200 | -0.78124500 |
| H | 0.54152900  | -0.30040400 | -1.76986700 |



|   |             |             |             |
|---|-------------|-------------|-------------|
| H | 2.06415200  | -0.41925200 | 1.98839100  |
| O | 2.91056200  | -0.71380700 | -0.57021700 |
| N | -1.77133800 | -0.47205600 | -0.08403800 |
| O | -2.56157800 | -0.16069100 | 0.77644500  |
| O | -2.03933500 | -1.05371500 | -1.10938900 |
| O | 0.56172700  | 2.15615500  | -0.49592900 |
| O | -0.59825500 | 1.58143900  | -0.14344000 |

## INT2

|   |             |             |             |
|---|-------------|-------------|-------------|
| N | 0.13285200  | 0.31628500  | 1.30909200  |
| C | -0.38226800 | 0.31449000  | -0.04626900 |
| N | 1.38239000  | -0.10120300 | 1.18627700  |
| C | 1.81624400  | -0.28268900 | -0.13454300 |
| N | 0.71825000  | 0.01957500  | -0.87522800 |
| H | 0.67732300  | -0.04505800 | -1.88236900 |
| H | 1.98368400  | -0.18963500 | 1.99658000  |
| O | 2.92399700  | -0.62230800 | -0.48191200 |
| N | -1.41727800 | -0.92026200 | -0.07477000 |
| O | -2.53304900 | -0.71785000 | 0.33741600  |
| O | -0.99014000 | -1.98781300 | -0.43863700 |
| O | -0.35810100 | 2.56985800  | -0.27336100 |
| O | -1.16500100 | 1.36350200  | -0.37437300 |

## INT3

|   |             |             |             |
|---|-------------|-------------|-------------|
| N | 0.12953800  | 1.35371100  | 0.00014500  |
| C | -0.38814400 | 0.15584400  | 0.00011900  |
| N | 1.48259700  | 1.10652500  | -0.00031600 |
| C | 1.79955100  | -0.21528500 | 0.00044400  |
| N | 0.56367100  | -0.82607700 | -0.00001000 |
| H | 0.39196900  | -1.82138500 | -0.00030500 |
| H | 2.14020200  | 1.87169900  | -0.00079400 |
| O | 2.90877300  | -0.74343800 | -0.00003700 |
| N | -1.73313800 | -0.13082400 | 0.00002300  |
| O | -2.58049200 | 0.83444100  | 0.00005700  |
| O | -2.09069300 | -1.36813100 | -0.00016700 |

O<sub>2</sub>

|   |            |            |             |
|---|------------|------------|-------------|
| O | 0.00000000 | 0.00000000 | 0.59379900  |
| O | 0.00000000 | 0.00000000 | -0.59379900 |

## NTOa

|   |             |             |             |
|---|-------------|-------------|-------------|
| N | -0.13372800 | 1.30609700  | -0.00001200 |
| C | 0.31491900  | 0.08067200  | 0.00000800  |
| N | -1.46473900 | 1.08068800  | 0.00010000  |
| C | -1.75975000 | -0.27043600 | -0.00036100 |
| N | -0.56606200 | -0.92463300 | 0.00010200  |
| H | -2.11815400 | 1.85145000  | 0.00039500  |
| O | -2.91269800 | -0.74723500 | 0.00005000  |
| N | 1.75143100  | -0.15063100 | 0.00004900  |
| O | 2.49071300  | 0.81351300  | -0.00008400 |
| O | 2.13183800  | -1.30296700 | 0.00003900  |

HO<sub>2</sub>•

|   |             |             |            |
|---|-------------|-------------|------------|
| H | -0.87849200 | -0.88366200 | 0.00000000 |
| O | 0.05490600  | -0.59537500 | 0.00000000 |
| O | 0.05490600  | 0.70583300  | 0.00000000 |

## NTOa'

|   |             |             |             |
|---|-------------|-------------|-------------|
| N | -0.16677700 | 1.33693100  | -0.00012700 |
| C | 0.34517200  | 0.14105100  | -0.00002900 |
| N | -1.50614700 | 1.20048800  | -0.00004200 |
| C | -1.81300900 | -0.13371200 | -0.00004000 |
| N | -0.61253100 | -0.81969000 | 0.00002500  |
| H | -0.48263000 | -1.82142500 | 0.00010300  |
| O | -2.94453800 | -0.65030200 | 0.00004100  |
| N | 1.73421900  | -0.13492900 | 0.00001500  |
| O | 2.51923800  | 0.79881200  | -0.00000700 |
| O | 2.06883700  | -1.31128600 | 0.00011800  |

TS(INT2→INT4+NO<sub>2</sub><sup>-</sup>)

|   |             |             |             |
|---|-------------|-------------|-------------|
| N | 0.13626900  | 0.40321000  | 1.28935500  |
| C | -0.29181900 | 0.59729700  | 0.01681400  |
| N | 1.37370300  | -0.05352000 | 1.15525900  |
| C | 1.83281900  | -0.06900400 | -0.16043700 |
| N | 0.75338100  | 0.41719300  | -0.85387300 |
| H | 0.70082600  | 0.49625200  | -1.86065200 |
| H | 1.91346300  | -0.34532800 | 1.96115500  |
| O | 2.92113500  | -0.42451200 | -0.55705100 |
| N | -1.24287200 | -1.27039500 | -0.11468900 |
| O | -2.42478300 | -1.35032500 | 0.10436400  |
| O | -0.49185200 | -2.19445200 | -0.30414500 |
| O | -1.00416400 | 2.70921000  | -0.16172700 |
| O | -1.37579300 | 1.28556700  | -0.27783200 |

## INT4

|   |             |             |             |
|---|-------------|-------------|-------------|
| N | 0.34400600  | 1.12127100  | -0.00049600 |
| C | 0.62482500  | -0.12991600 | -0.00052000 |
| N | -1.02539400 | 1.12355800  | 0.00005100  |
| C | -1.57540600 | -0.12423100 | 0.00029900  |
| N | -0.45790700 | -0.94398500 | 0.00027500  |
| H | -0.46585400 | -1.95517700 | -0.00115400 |
| H | -1.53268900 | 1.99639500  | 0.00015800  |
| O | -2.75357900 | -0.44998600 | 0.00013200  |
| O | 2.83979400  | 0.18413700  | 0.00067700  |
| O | 1.87342100  | -0.68693200 | -0.00037000 |

NO<sub>2</sub><sup>-</sup>

|   |             |             |            |
|---|-------------|-------------|------------|
| N | 0.00000000  | 0.45926700  | 0.00000000 |
| O | 1.05332200  | -0.20083000 | 0.00000000 |
| O | -1.05332200 | -0.20102900 | 0.00000000 |

## INT5

|   |             |             |             |
|---|-------------|-------------|-------------|
| N | 0.44945100  | 1.29833600  | 0.45188000  |
| C | 0.83035600  | 0.14000200  | 0.05689400  |
| N | -0.91110800 | 1.27218700  | 0.37851600  |
| C | -1.38076800 | 0.11003200  | -0.48231200 |
| N | -0.13640100 | -0.74967700 | -0.31924000 |
| H | 0.07200400  | -1.30543100 | -1.14310900 |
| H | -1.29486700 | 2.17274300  | 0.10746300  |
| O | -1.68189900 | 0.41602600  | -1.70509900 |
| N | 2.22964300  | -0.20308900 | 0.03879800  |
| O | 3.04185400  | 0.59345400  | 0.47044000  |

|   |             |             |             |
|---|-------------|-------------|-------------|
| O | 2.51796400  | -1.29043500 | -0.43026700 |
| O | -2.48371600 | -0.51337400 | 0.13086700  |
| O | -2.25617300 | -0.91714900 | 1.50136900  |

TS(INT3+O<sub>2</sub><sup>-•</sup>→INT6+NO<sub>2</sub><sup>-</sup>)

|   |             |             |             |
|---|-------------|-------------|-------------|
| N | 0.10953700  | -0.23624400 | 1.39930500  |
| C | -0.40862100 | -0.11841200 | 0.13170400  |
| N | 1.43814400  | -0.34003400 | 1.16932300  |
| C | 1.76192200  | -0.54869400 | -0.15491400 |
| N | 0.54296200  | -0.58488700 | -0.78550100 |
| H | 0.46220900  | -0.39997500 | -1.77609900 |
| H | 2.09164100  | -0.39638600 | 1.93802200  |
| O | 2.87579700  | -0.70473800 | -0.63078500 |
| N | -1.75755600 | -0.50422400 | -0.07018200 |
| O | -2.59995900 | -0.25759800 | 0.87997400  |
| O | -2.14549900 | -0.63102800 | -1.29961000 |
| O | 0.74474100  | 2.08714300  | -0.33054300 |
| O | -0.50073700 | 1.56331000  | -0.12069600 |

INT6

|   |             |             |             |
|---|-------------|-------------|-------------|
| N | -0.05576600 | 1.49497600  | 0.00000100  |
| C | 0.66935500  | 0.41554800  | 0.00007200  |
| N | -1.35300400 | 0.99769500  | -0.00062300 |
| C | -1.41496800 | -0.35090600 | -0.00001600 |
| N | -0.08251900 | -0.72077900 | -0.00025900 |
| H | 0.29226700  | -1.65844900 | 0.00051900  |
| H | -2.14096900 | 1.62640600  | 0.00180800  |
| O | -2.40318200 | -1.08782800 | 0.00025100  |
| O | 2.51366500  | -0.92822500 | -0.00021200 |
| O | 1.98469300  | 0.42117200  | 0.00039900  |

HO<sub>2</sub><sup>-</sup>

|   |             |             |            |
|---|-------------|-------------|------------|
| H | -0.88184500 | -0.89906000 | 0.00000000 |
| O | 0.05511500  | -0.67615800 | 0.00000000 |
| O | 0.05511500  | 0.78854000  | 0.00000000 |

NTOa

|   |             |             |             |
|---|-------------|-------------|-------------|
| N | -0.13372800 | 1.30609700  | -0.00001200 |
| C | 0.31491900  | 0.08067200  | 0.00000800  |
| N | -1.46473900 | 1.08068800  | 0.00010000  |
| C | -1.75975000 | -0.27043600 | -0.00036100 |
| N | -0.56606200 | -0.92463300 | 0.00010200  |
| H | -2.11815400 | 1.85145000  | 0.00039500  |
| O | -2.91269800 | -0.74723500 | 0.00005000  |
| N | 1.75143100  | -0.15063100 | 0.00004900  |
| O | 2.49071300  | 0.81351300  | -0.00008400 |
| O | 2.13183800  | -1.30296700 | 0.00003900  |

TS(NTOa+O<sub>2</sub><sup>-•</sup>→INT1a)

|   |             |             |             |
|---|-------------|-------------|-------------|
| N | 0.20042000  | 0.52593000  | -1.25629800 |
| C | 0.63892700  | -0.20208400 | -0.21503800 |
| N | -1.07391500 | 0.15934200  | -1.30992600 |
| C | -1.46748100 | -0.54582800 | -0.07912500 |
| N | -0.18354300 | -0.94458500 | 0.45072100  |
| H | -1.71402600 | 0.76028300  | -1.81732900 |
| O | -2.46821500 | -1.32746900 | -0.08909300 |

|   |             |             |             |
|---|-------------|-------------|-------------|
| N | 2.07395800  | -0.15142300 | 0.09788100  |
| O | 2.78685500  | 0.53843500  | -0.60025000 |
| O | 2.46151100  | -0.80606000 | 1.04095100  |
| O | -1.87413400 | 0.68861100  | 0.88757300  |
| O | -0.96015300 | 1.73177500  | 0.97402700  |

## INT1a

|   |             |             |             |
|---|-------------|-------------|-------------|
| N | -0.34587000 | 1.29608700  | -0.51418100 |
| C | -0.73208100 | 0.12947500  | 0.07156000  |
| N | 0.94358600  | 1.27149700  | -0.34356700 |
| C | 1.43646300  | 0.06295200  | 0.48962300  |
| N | 0.11561000  | -0.64546100 | 0.62912500  |
| H | 1.49610300  | 2.08307800  | -0.59820200 |
| O | 1.98735200  | 0.40463500  | 1.60427300  |
| N | -2.17492100 | -0.17554400 | 0.04968200  |
| O | -2.90752800 | 0.57786200  | -0.55552100 |
| O | -2.54214000 | -1.16881100 | 0.63741700  |
| O | 2.30803700  | -0.69028900 | -0.30193200 |
| O | 1.71787500  | -1.05635800 | -1.57377600 |

TS(NTOa+O<sub>2</sub>\*→INT2a)

|   |             |             |             |
|---|-------------|-------------|-------------|
| N | 0.15676600  | -0.06314100 | 1.37375100  |
| C | -0.29987100 | -0.09386500 | 0.07719700  |
| N | 1.47484500  | -0.18388500 | 1.16782700  |
| C | 1.76214100  | -0.54308300 | -0.16618700 |
| N | 0.59943100  | -0.55411700 | -0.83537500 |
| H | 2.11437600  | -0.24093900 | 1.94906600  |
| O | 2.91065900  | -0.79837400 | -0.56151900 |
| N | -1.72020100 | -0.52561000 | -0.05945200 |
| O | -2.48998900 | -0.19452900 | 0.81863900  |
| O | -2.04084400 | -1.13868700 | -1.05422600 |
| O | 0.48449600  | 2.22708400  | -0.56660300 |
| O | -0.67230700 | 1.57324200  | -0.25408900 |

## INT2a

|   |             |             |             |
|---|-------------|-------------|-------------|
| N | 0.14754000  | 0.30233800  | 1.30472900  |
| C | -0.31099600 | 0.33867400  | -0.07671300 |
| N | 1.38412500  | -0.13418900 | 1.16567100  |
| C | 1.77777000  | -0.23870100 | -0.20686200 |
| N | 0.72991900  | 0.08731300  | -0.95582300 |
| H | 1.99841700  | -0.23911900 | 1.96344500  |
| O | 2.92382300  | -0.57463600 | -0.51987100 |
| N | -1.36896500 | -0.95567200 | -0.10452100 |
| O | -2.50097600 | -0.79341100 | 0.29725400  |
| O | -0.91788600 | -2.02708700 | -0.43852100 |
| O | -0.45479200 | 2.60982100  | -0.25003900 |
| O | -1.18109300 | 1.35290600  | -0.35537100 |

## INT3a

|   |             |             |             |
|---|-------------|-------------|-------------|
| N | -0.13894300 | 1.32130400  | -0.00003700 |
| N | -1.48895400 | 1.07775400  | 0.00001400  |
| C | -1.76138000 | -0.26482100 | -0.00013600 |
| O | -2.91707100 | -0.76011100 | 0.00003300  |
| N | -0.57071900 | -0.91481700 | 0.00003200  |
| C | 0.33730900  | 0.08929800  | -0.00001300 |
| N | 1.71193600  | -0.14761100 | 0.00001300  |

|   |             |             |             |
|---|-------------|-------------|-------------|
| O | 2.52997300  | 0.85481900  | -0.00001800 |
| O | 2.15002200  | -1.36231300 | 0.00006200  |
| H | -2.15219100 | 1.83756300  | 0.00011800  |

## INT4a

|   |             |             |             |
|---|-------------|-------------|-------------|
| N | 0.17489900  | 1.31796900  | -0.00007200 |
| C | -0.30145200 | 0.08272600  | -0.00000400 |
| N | 1.50588600  | 1.17190100  | 0.00008700  |
| C | 1.76855800  | -0.18656400 | -0.00003500 |
| N | 0.61261800  | -0.90362400 | -0.00001800 |
| O | 2.94785100  | -0.67132000 | 0.00006500  |
| N | -1.69916400 | -0.15062800 | -0.00002700 |
| O | -2.47203600 | 0.80590100  | 0.00001000  |
| O | -2.09610500 | -1.31286800 | -0.00001900 |

## NTO\*

|   |             |             |             |
|---|-------------|-------------|-------------|
| N | -0.17797500 | 1.36792100  | 0.00006600  |
| C | 0.38720300  | 0.09633300  | 0.00008900  |
| N | -1.46881800 | 1.11554800  | -0.00024000 |
| C | -1.79411500 | -0.24046700 | 0.00022900  |
| N | -0.52730800 | -0.85373000 | -0.00008000 |
| H | -0.35644100 | -1.85528500 | -0.00022300 |
| H | -2.14676100 | 1.87234200  | -0.00052500 |
| O | -2.87194500 | -0.75314100 | 0.00007000  |
| N | 1.72835400  | -0.12817900 | 0.00011700  |
| O | 2.49736900  | 0.88237200  | 0.00006300  |
| O | 2.13268900  | -1.33712700 | -0.00015800 |

TS(NTO\*+O<sub>2</sub>\*→INT1)

|   |             |             |             |
|---|-------------|-------------|-------------|
| N | 0.28263300  | 1.40355800  | 0.35275100  |
| C | 0.77523800  | 0.21408600  | -0.14771900 |
| N | -1.00799900 | 1.31860100  | 0.12346900  |
| C | -1.46169400 | 0.09199300  | -0.53999900 |
| N | -0.13618300 | -0.53874000 | -0.69992900 |
| H | 0.02144800  | -1.47079200 | -1.06439400 |
| H | -1.61169900 | 2.10934600  | 0.31236200  |
| O | -2.28976300 | 0.12394600  | -1.45989600 |
| N | 2.12035100  | -0.13935700 | -0.05855300 |
| O | 2.92538800  | 0.68233400  | 0.49584700  |
| O | 2.48062200  | -1.26500700 | -0.56179400 |
| O | -2.11233500 | -0.77699100 | 0.66223300  |
| O | -1.39174000 | -0.86221500 | 1.72038100  |

## TS(INT4→INT7)

|   |             |             |             |
|---|-------------|-------------|-------------|
| N | 0.17347100  | 1.55109900  | -0.00009600 |
| C | -0.64010200 | 0.45779600  | -0.00025000 |
| N | 1.35665800  | 0.98811800  | 0.00041400  |
| C | 1.32194000  | -0.43890500 | -0.00017700 |
| N | -0.02919100 | -0.70891900 | -0.00092800 |
| H | 2.20293200  | 1.55012800  | -0.00171200 |
| O | 2.27784600  | -1.16312100 | 0.00056100  |
| O | -2.32251200 | -0.92732000 | 0.00025600  |
| O | -1.93079800 | 0.45251000  | 0.00043400  |
| H | -0.99682000 | -1.37211000 | -0.00145300 |

## INT7

|   |             |             |             |
|---|-------------|-------------|-------------|
| N | 0.28026500  | 1.09225300  | -0.00231800 |
| C | 0.51760700  | -0.26920700 | -0.00042800 |
| N | -1.02083400 | 1.12275500  | -0.00238300 |
| C | -1.58390200 | -0.18445400 | -0.00193200 |
| N | -0.51563100 | -1.05678700 | 0.00088700  |
| H | -1.52980300 | 2.00118200  | -0.00367500 |
| O | -2.77075700 | -0.41340800 | -0.00248500 |
| O | 2.72643600  | 0.23348600  | 0.11044100  |
| O | 1.74607800  | -0.77452900 | -0.00450200 |
| H | 3.10691200  | 0.24884200  | -0.78310000 |

## TS(INT7→INT8+OH\*)

|   |             |             |             |
|---|-------------|-------------|-------------|
| N | -0.06734000 | 1.29173000  | -0.10288700 |
| C | -0.55700700 | -0.02546600 | -0.40090300 |
| N | 1.13290900  | 1.10134700  | 0.14750200  |
| C | 1.50247300  | -0.34430300 | 0.05419100  |
| N | 0.35971700  | -0.97048800 | -0.28866600 |
| H | 1.76587400  | 1.87010800  | 0.38090400  |
| O | 2.62559300  | -0.71655400 | 0.26674200  |
| O | -2.64359600 | -0.40427400 | 0.77002300  |
| O | -1.77959400 | -0.14094500 | -0.71097200 |
| H | -3.03489900 | 0.48456400  | 0.80137800  |

## INT8

|   |             |             |             |
|---|-------------|-------------|-------------|
| N | -0.64526400 | 1.24483900  | 0.00031000  |
| C | -1.10068500 | -0.26089100 | -0.00004900 |
| N | 0.55716600  | 1.16891900  | -0.00016300 |
| C | 1.07708300  | -0.33687600 | 0.00008900  |
| N | -0.02790200 | -1.05764500 | 0.00040500  |
| H | 1.15984200  | 2.00234100  | -0.00010800 |
| O | 2.25136800  | -0.52500500 | -0.00021400 |
| O | -2.27714600 | -0.46356000 | -0.00028500 |

## OH\*

|   |            |            |             |
|---|------------|------------|-------------|
| O | 0.00000000 | 0.00000000 | 0.10827300  |
| H | 0.00000000 | 0.00000000 | -0.86618500 |

## TS(INT8→INT9)

|   |             |             |             |
|---|-------------|-------------|-------------|
| N | 0.82793400  | 1.20317500  | 0.00009100  |
| C | 1.06292300  | -0.29124100 | -0.00006100 |
| N | -0.36565200 | 1.39473600  | 0.00016300  |
| C | -1.19384900 | -0.45195200 | -0.00000800 |
| N | -0.07364600 | -1.03722100 | -0.00015400 |
| H | -0.64169400 | 2.38566600  | 0.00027000  |
| O | -2.35517900 | -0.42948300 | 0.00004100  |
| O | 2.19352800  | -0.67693500 | -0.00011000 |

## INT9

|   |             |             |             |
|---|-------------|-------------|-------------|
| N | 1.05936100  | 1.10864800  | 0.00065600  |
| C | 1.00334700  | -0.37287400 | -0.00008600 |
| N | -0.05299600 | 1.61174800  | -0.00033600 |
| C | -1.34650400 | -0.48448800 | 0.00000800  |
| N | -0.22684800 | -0.98561400 | -0.00054500 |
| H | 0.04019400  | 2.63692100  | 0.00030400  |
| O | -2.47209600 | -0.24135800 | 0.00035500  |



O 2.04236200 -0.96316900 -0.00013700

TS(INT7→INT10)

N -0.44867800 1.14999600 0.00428300  
 C -0.48876100 -0.16691200 0.00164900  
 N 0.79538200 1.55520100 -0.00406400  
 C 1.74866800 -0.50351700 0.00102100  
 N 0.59518100 -0.97525300 0.00023900  
 H 0.80477500 2.57679000 0.00779800  
 O 2.90100700 -0.43837300 0.00129700  
 O -2.75991400 -0.03886000 -0.11849600  
 O -1.62935500 -0.86478700 0.01362100  
 H -3.05131900 0.07233500 0.80159400

INT10

N -0.50790000 1.15987600 0.00625600  
 C -0.47374400 -0.15033800 -0.00014500  
 N 0.69632700 1.68610600 -0.00982600  
 C 1.79604400 -0.55706700 0.00103600  
 N 0.62814700 -0.94314800 -0.00538100  
 H 0.57146600 2.70043400 0.01116700  
 O 2.94085400 -0.43699000 0.00566100  
 O -2.75534700 -0.13539000 -0.11731900  
 O -1.58570800 -0.90227200 0.01685200  
 H -3.01967600 0.02137700 0.80458600

TS(INT9+OH\*→INT11+N<sub>2</sub>+H<sub>2</sub>O)

N -0.67680700 -0.84576100 -0.00335300  
 C 0.79174000 -1.12159300 -0.00022500  
 N -0.93114900 0.33730000 -0.00180200  
 C 1.42725100 1.14864100 0.00081700  
 N 1.65435400 -0.05583100 0.00119300  
 H -1.98385900 0.50192700 -0.00474500  
 O 1.43594000 2.29919700 0.00077100  
 O 1.13076700 -2.26480400 0.00058200  
 O -3.55434600 0.44046400 -0.00186900  
 H -3.75375600 -0.51302000 0.03304700

INT11

C 1.14779300 -0.35107100 -0.00005500  
 C -1.15452000 0.06329100 -0.00029800  
 N 0.01469600 0.42554200 0.00006200  
 O -2.28138600 -0.15530200 0.00015100  
 O 2.27357200 -0.00121200 0.00005900

TS(INT9+OH\*→INT12)

N 1.31607100 1.08409200 0.15645900  
 C 1.18817600 -0.35784400 -0.15054200  
 N 0.24635300 1.66589700 0.07163800  
 C -1.17147900 -0.25035000 -0.41470500  
 N -0.06368400 -0.88382800 -0.41636800  
 H 0.38406200 2.66443300 0.28176700  
 O -2.16960500 0.10344400 -0.88135400  
 O 2.18669900 -1.01478900 -0.17535000  
 O -1.21474400 -0.42702600 1.41305700  
 H -1.39423000 -1.37142700 1.57680100

## INT12

|   |             |             |             |
|---|-------------|-------------|-------------|
| N | 1.91434500  | 0.33866000  | -0.01228700 |
| C | 0.91174800  | -0.73876900 | 0.07226700  |
| N | 1.40842700  | 1.45691100  | -0.00038000 |
| C | -1.40206700 | 0.05523000  | 0.06628700  |
| N | -0.25594500 | -0.41434900 | 0.76061300  |
| H | 2.15276800  | 2.16087800  | -0.09320000 |
| O | -2.33143800 | -0.67951900 | -0.11930200 |
| O | 1.17677800  | -1.82141000 | -0.34883200 |
| O | -1.37187600 | 1.32388700  | -0.26414500 |
| H | -0.46634900 | 1.68813900  | -0.11551700 |

TS(INT9+OH<sup>•</sup>→INT13)

|   |             |             |             |
|---|-------------|-------------|-------------|
| N | -0.67817400 | 1.30196600  | 0.10193900  |
| C | -0.74659600 | -0.16510200 | 0.35132500  |
| N | 0.46720600  | 1.69699300  | -0.03292900 |
| C | 1.56289700  | -0.54640300 | 0.05167500  |
| N | 0.43142900  | -0.89291700 | 0.35735400  |
| H | 0.45188300  | 2.71346400  | -0.19413800 |
| O | 2.68570700  | -0.43413300 | -0.18944300 |
| O | -1.75275400 | -0.57044000 | 0.94579900  |
| O | -1.50792600 | -0.63607300 | -1.24127800 |
| H | -2.29313100 | -0.06156200 | -1.32903300 |

## INT13

|   |             |             |             |
|---|-------------|-------------|-------------|
| N | -0.81642500 | 1.24591900  | 0.07727500  |
| C | -0.81562800 | -0.25039800 | 0.02359500  |
| N | 0.29502700  | 1.73376300  | -0.02846500 |
| C | 1.54668000  | -0.48151100 | -0.13152800 |
| N | 0.40823900  | -0.87425900 | -0.32777900 |
| H | 0.21473100  | 2.75775000  | 0.03598600  |
| O | 2.68210800  | -0.29890200 | -0.02276600 |
| O | -1.05858300 | -0.69728100 | 1.31061200  |
| O | -1.77932000 | -0.63209600 | -0.87409200 |
| H | -2.56257400 | -0.07802800 | -0.74563100 |

TS(INT11+H<sub>2</sub>O→INT14)

|   |             |             |             |
|---|-------------|-------------|-------------|
| C | 1.89040300  | 0.11734400  | -0.01293600 |
| C | 0.01273600  | -1.07989900 | -0.02318000 |
| N | 0.52212800  | 0.07717600  | 0.12242400  |
| O | 0.00929600  | -2.22017200 | -0.22620600 |
| O | 2.60133600  | 1.06390300  | 0.05941600  |
| O | -1.82343900 | -0.63440500 | 0.32978700  |
| H | -2.40429100 | -1.16528200 | -0.23168900 |
| H | -0.80200800 | 1.98428300  | -0.12507400 |
| O | -1.75953900 | 1.97759600  | -0.25944100 |
| H | -1.97331500 | 0.31664900  | 0.10712500  |
| H | -2.11534100 | 2.60407100  | 0.38091600  |

## INT14

|   |             |             |             |
|---|-------------|-------------|-------------|
| C | 1.45322100  | 0.26147200  | 0.00000800  |
| C | -0.92469100 | 0.10818500  | -0.00008600 |
| N | 0.32959000  | -0.48787100 | -0.00016600 |
| O | -1.11264200 | 1.29764600  | -0.00000100 |
| O | 2.58738900  | -0.08674000 | 0.00010400  |

|   |             |             |             |
|---|-------------|-------------|-------------|
| O | -1.86697800 | -0.82402400 | 0.00016300  |
| H | -2.73508400 | -0.39409900 | -0.00009500 |
| H | 0.39463400  | -1.50380000 | -0.00039900 |

## TS(INT11→INT15+CO)

|   |             |             |             |
|---|-------------|-------------|-------------|
| C | -1.34614600 | -0.44264600 | 0.00058700  |
| C | 1.26919600  | 0.17014900  | 0.00020900  |
| N | 0.27686900  | 0.89561400  | 0.00004000  |
| O | 2.23237400  | -0.47876800 | -0.00023600 |
| O | -2.41692200 | -0.10052200 | -0.00039500 |

## INT15

|   |             |             |            |
|---|-------------|-------------|------------|
| C | 0.00000000  | -0.04294000 | 0.00000000 |
| N | -0.70453000 | -1.02643300 | 0.00000000 |
| O | 0.61646400  | 0.93033300  | 0.00000000 |

## CO

|   |            |            |             |
|---|------------|------------|-------------|
| C | 0.00000000 | 0.00000000 | -0.64144300 |
| O | 0.00000000 | 0.00000000 | 0.48108200  |

## INT16

|   |             |             |             |
|---|-------------|-------------|-------------|
| C | 0.04265800  | 0.01519000  | -0.00004100 |
| N | -1.15647800 | -0.12520800 | 0.00001300  |
| O | 1.20550500  | 0.01659900  | 0.00001600  |
| H | -1.80464700 | 0.65252400  | 0.00002100  |

HOO<sup>-</sup>

|   |             |             |            |
|---|-------------|-------------|------------|
| H | -0.88184500 | -0.89906000 | 0.00000000 |
| O | 0.05511500  | -0.67615800 | 0.00000000 |
| O | 0.05511500  | 0.78854000  | 0.00000000 |

CO<sub>2</sub>

|   |            |            |             |
|---|------------|------------|-------------|
| C | 0.00000000 | 0.00000000 | 0.00000000  |
| O | 0.00000000 | 0.00000000 | 1.15522600  |
| O | 0.00000000 | 0.00000000 | -1.15522600 |

TS(INT16+H<sub>2</sub>O →INT17)

|   |             |             |             |
|---|-------------|-------------|-------------|
| C | -1.46611500 | -0.32693100 | 0.07115500  |
| N | -0.57152200 | -1.20824800 | 0.16767900  |
| O | -2.59468400 | 0.02518200  | 0.18602900  |
| H | -0.98845200 | -2.06477600 | 0.53063000  |
| H | -1.11565200 | 1.86043000  | -0.45424500 |
| O | -0.58002600 | 1.06792900  | -0.59843300 |
| H | 0.31824700  | 1.21604000  | -0.16637900 |
| H | 2.29907000  | 2.04576100  | 0.10916600  |
| O | 1.76073900  | 1.35110500  | 0.50402700  |
| H | 2.17746700  | 0.50104400  | 0.25393600  |
| O | 2.19665600  | -1.19339900 | -0.33143100 |
| H | 2.61558500  | -1.85422100 | 0.22934000  |
| H | 1.22961000  | -1.29149100 | -0.18467400 |

## INT17

|   |             |             |             |
|---|-------------|-------------|-------------|
| C | -0.03079300 | 0.11038000  | -0.00000100 |
| N | 1.26130000  | -0.24168700 | 0.00005100  |
| H | 1.53920400  | -1.21003800 | -0.00014100 |
| O | -0.45112300 | 1.25795900  | -0.00000500 |

|   |             |             |             |
|---|-------------|-------------|-------------|
| H | 1.96568300  | 0.47785400  | -0.00013800 |
| O | -0.84759700 | -0.95814300 | -0.00000400 |
| H | -1.75946800 | -0.63681700 | 0.00000500  |

TS(INT17→NH<sub>3</sub>+CO<sub>2</sub>)

|   |             |             |             |
|---|-------------|-------------|-------------|
| C | 1.24025700  | -0.16438900 | 0.02411400  |
| N | 0.64598600  | 0.89774500  | 0.77524100  |
| O | 2.24848300  | 0.09986300  | -0.64615400 |
| H | 1.28932400  | 1.66813000  | 0.91868100  |
| H | -0.92080800 | -1.28168500 | 0.08650800  |
| O | 0.64225100  | -1.27942200 | 0.07806500  |
| H | 0.27027400  | 0.57318500  | 1.66155900  |
| H | -1.72241400 | 1.56558000  | -1.25111900 |
| O | -1.70978400 | 1.28238300  | -0.32602000 |
| H | -0.74516900 | 1.32846100  | 0.02950300  |
| O | -1.91021800 | -1.09917000 | -0.04838400 |
| H | -2.37595800 | -1.35767300 | 0.75630900  |
| H | -1.92455900 | 0.17688800  | -0.23285700 |

NH<sub>3</sub>

|   |             |             |             |
|---|-------------|-------------|-------------|
| N | -0.00000100 | 0.00000700  | -0.11707800 |
| H | -0.85705800 | 0.38028400  | 0.27318900  |
| H | 0.75789800  | 0.55203300  | 0.27318800  |
| H | 0.09916600  | -0.93236700 | 0.27316700  |

## NTOa\*

|   |             |             |             |
|---|-------------|-------------|-------------|
| N | -0.19016300 | 1.33225400  | 0.00004800  |
| C | 0.33730600  | 0.03396800  | 0.00011000  |
| N | -1.48067900 | 1.08853600  | -0.00001300 |
| C | -1.75856900 | -0.28843600 | -0.00003900 |
| N | -0.53036000 | -0.94102100 | 0.00007400  |
| H | -2.16014600 | 1.84063400  | -0.00004300 |
| O | -2.86717900 | -0.77496300 | -0.00006900 |
| N | 1.70546200  | -0.14273400 | 0.00015600  |
| O | 2.45339400  | 0.89795300  | -0.00013400 |
| O | 2.18352200  | -1.33212400 | -0.00007700 |

TS(NTOa\*+O<sub>2</sub><sup>•-</sup>→INT1a)

|   |             |             |             |
|---|-------------|-------------|-------------|
| N | 0.23099100  | -0.89037400 | -1.10469100 |
| C | 0.70470100  | -0.26006500 | 0.06535700  |
| N | -1.01243800 | -1.16641400 | -0.77732200 |
| C | -1.40789200 | -0.45388900 | 0.45352400  |
| N | -0.15147000 | -0.03164800 | 1.00200100  |
| H | -1.66861400 | -1.41180400 | -1.51093100 |
| O | -2.36335200 | -0.83300600 | 1.12947500  |
| N | 2.05318000  | 0.04655200  | 0.15377300  |
| O | 2.82497400  | -0.28776700 | -0.81440900 |
| O | 2.49232300  | 0.65710400  | 1.19420100  |
| O | -2.01117300 | 1.03699700  | -0.29012300 |
| O | -1.18703200 | 1.92526200  | -0.78398000 |

TS(NTOa\*+O<sub>2</sub><sup>•-</sup>→INT2a)

|   |             |             |             |
|---|-------------|-------------|-------------|
| N | 0.25076100  | -0.32237600 | 1.33866900  |
| C | -0.33867200 | 0.00621800  | 0.08544300  |
| N | 1.50380300  | -0.54975100 | 0.99303700  |
| C | 1.69590000  | -0.49343300 | -0.41942400 |

|   |             |             |             |
|---|-------------|-------------|-------------|
| N | 0.51595800  | -0.19765800 | -0.97239100 |
| H | 2.20225900  | -0.79553500 | 1.68291900  |
| O | 2.79229800  | -0.71630000 | -0.93648300 |
| N | -1.71921300 | -0.40631900 | -0.05473900 |
| O | -2.07155900 | -1.51501300 | 0.51747700  |
| O | -2.34080000 | 0.02931300  | -1.10449200 |
| O | 0.46816100  | 2.30751700  | 0.19505100  |
| O | -0.62370200 | 1.65092700  | 0.22706500  |

TS(INT3a+O<sub>2</sub><sup>-</sup>→INT5a)

|   |             |             |             |
|---|-------------|-------------|-------------|
| N | -0.69788000 | 1.42170400  | -0.31736000 |
| C | -0.92751800 | 0.15205700  | 0.00781900  |
| N | 0.72728800  | 1.54239900  | -0.12851600 |
| C | 1.16379500  | 0.25667600  | 0.46630000  |
| N | 0.08773100  | -0.63321700 | 0.37908900  |
| H | 1.11146100  | 1.61530300  | -1.06943400 |
| O | 1.91232000  | 0.28085100  | 1.49136900  |
| N | -2.24768900 | -0.34165100 | -0.02844900 |
| O | -3.22862100 | 0.45555700  | -0.31014300 |
| O | -2.46954500 | -1.59764400 | 0.18062600  |
| O | 2.21065600  | -0.26671100 | -0.90833300 |
| O | 3.12328100  | -1.12109600 | -0.59209700 |

## INT5a

|   |             |             |             |
|---|-------------|-------------|-------------|
| N | -0.59583500 | 1.37622700  | -0.43619300 |
| C | -0.80813300 | 0.19799000  | 0.08458400  |
| N | 0.76130100  | 1.59210700  | -0.05124500 |
| C | 1.34380100  | 0.26051200  | 0.35747300  |
| N | 0.11706400  | -0.52209100 | 0.66203900  |
| H | 1.27674400  | 1.98071200  | -0.83785200 |
| O | 2.24317500  | 0.32177700  | 1.30852100  |
| N | -2.21031700 | -0.30774400 | 0.01830700  |
| O | -3.07309100 | 0.41370700  | -0.44204500 |
| O | -2.42429700 | -1.42995300 | 0.42731800  |
| O | 1.89581700  | -0.22349900 | -0.91407000 |
| O | 2.48386700  | -1.54468400 | -0.77532800 |

TS(INT3a+O<sub>2</sub><sup>-</sup>→INT6a+NO<sub>2</sub><sup>-</sup>)

|   |             |             |             |
|---|-------------|-------------|-------------|
| N | 0.17014000  | -0.09538800 | 1.37573700  |
| C | -0.33985200 | -0.13872600 | 0.07791800  |
| N | 1.48185800  | -0.21667000 | 1.14299000  |
| C | 1.74769100  | -0.56634800 | -0.19807200 |
| N | 0.58554800  | -0.59475000 | -0.84624400 |
| H | 2.14601600  | -0.22712700 | 1.90476500  |
| O | 2.90259400  | -0.80737100 | -0.60639400 |
| N | -1.69322200 | -0.58446400 | -0.03738000 |
| O | -2.50829300 | -0.30613500 | 0.93504600  |
| O | -2.15965400 | -0.80422000 | -1.22734300 |
| O | 0.58099400  | 2.22979300  | -0.42119100 |
| O | -0.61605600 | 1.54999100  | -0.25881200 |

## INT6a

|   |             |             |             |
|---|-------------|-------------|-------------|
| N | -0.03385000 | 1.44352800  | 0.05985500  |
| C | 0.62707000  | 0.30967300  | -0.05569300 |
| N | -1.34114000 | 0.98737200  | 0.05962100  |
| C | -1.39057300 | -0.37166200 | -0.00917400 |

|   |             |             |             |
|---|-------------|-------------|-------------|
| N | -0.10831100 | -0.82120200 | -0.09704200 |
| H | -2.11364900 | 1.62339700  | 0.18154900  |
| O | -2.44663200 | -1.05818900 | 0.00101800  |
| O | 2.62044300  | -0.87348300 | 0.18075100  |
| O | 1.96091000  | 0.36675400  | -0.17544200 |

TS(INT4a+O<sub>2</sub><sup>-•</sup>→INT7a)

|   |             |             |             |
|---|-------------|-------------|-------------|
| N | 0.06117400  | 0.42047400  | -1.31423300 |
| C | 0.60604200  | -0.26569000 | -0.18361300 |
| N | -1.16449300 | 0.15685700  | -1.32340100 |
| C | -1.48453200 | -0.57566400 | -0.08635500 |
| N | -0.25276500 | -0.97261600 | 0.48547700  |
| O | -2.55590200 | -1.23717000 | 0.01392700  |
| N | 1.95435400  | -0.18699700 | 0.06159300  |
| O | 2.70650300  | 0.52322800  | -0.69166800 |
| O | 2.44020700  | -0.82576700 | 1.05685700  |
| O | -1.77446300 | 0.92933100  | 0.76336900  |
| O | -0.68096300 | 1.75089100  | 0.88923500  |

## INT7a

|   |             |             |             |
|---|-------------|-------------|-------------|
| N | -0.24999700 | -1.12577900 | 0.85111600  |
| C | -0.75195500 | -0.09327400 | -0.06627800 |
| N | 0.96669200  | -1.17893900 | 0.69518900  |
| C | 1.41301100  | -0.21453100 | -0.44367400 |
| N | 0.13198200  | 0.47264500  | -0.78795400 |
| O | 1.94525000  | -0.88216400 | -1.42286300 |
| N | -2.10798000 | 0.14754100  | -0.07670700 |
| O | -2.88319100 | -0.50922000 | 0.70097200  |
| O | -2.57108600 | 1.03509100  | -0.87298900 |
| O | 2.33145300  | 0.68651800  | 0.11266900  |
| O | 1.78367300  | 1.37459300  | 1.26823600  |

TS(INT4a+O<sub>2</sub><sup>-•</sup>→INT8a)

|   |             |             |             |
|---|-------------|-------------|-------------|
| N | 0.16054000  | 0.25949400  | 1.33321100  |
| C | -0.38426200 | -0.16691900 | 0.08178900  |
| N | 1.39705100  | 0.07180400  | 1.25837400  |
| C | 1.66230300  | -0.66529400 | 0.00148300  |
| N | 0.51353800  | -0.89058400 | -0.63560500 |
| O | 2.81494300  | -1.02296000 | -0.27727300 |
| N | -1.74950600 | -0.42241500 | 0.02819300  |
| O | -2.53856500 | 0.22130300  | 0.82365900  |
| O | -2.22760000 | -1.10043100 | -0.96046100 |
| O | 1.00632900  | 1.84382900  | -0.80811700 |
| O | -0.29505800 | 1.54140700  | -0.57641300 |

## INT8a

|   |             |             |             |
|---|-------------|-------------|-------------|
| N | 0.29390900  | -0.27843700 | -1.33209300 |
| C | -0.30965200 | -0.16772900 | 0.07439900  |
| N | 1.44944100  | 0.11001200  | -1.28988000 |
| C | 1.75622500  | 0.54590000  | 0.14948200  |
| N | 0.70062200  | 0.37334400  | 0.89448500  |
| O | 2.88847100  | 0.97706200  | 0.38522800  |
| N | -1.49094700 | 0.72454100  | -0.04826700 |
| O | -2.33993200 | 0.42826600  | -0.98651200 |
| O | -1.91344200 | 1.28240900  | 1.04475300  |
| O | 0.25908700  | -2.38113900 | 0.49595000  |



O           -0.81301200 -1.40350400 0.44645600

### Hydroperoxyl radical induced degradation of NTO and NTOa

#### NTO

N           -0.12666700 1.32311000 -0.00010500  
 C           0.36226000 0.13534300 -0.00006400  
 N           -1.45970700 1.10938500 0.00015700  
 C           -1.80641500 -0.22101300 -0.00023200  
 N           -0.57239800 -0.84500400 -0.00001900  
 H           -0.41365700 -1.84430400 0.00016100  
 H           -2.10256000 1.88985600 0.00045900  
 O           -2.91770500 -0.72084900 0.00004300  
 N           1.78328300 -0.13448200 0.00003200  
 O           2.53711800 0.81007700 -0.00002600  
 O           2.10678200 -1.30205200 0.00007100

#### HO<sub>2</sub><sup>•</sup>

H           -0.87849200 -0.88366200 0.00000000  
 O           0.05490600 -0.59537500 0.00000000  
 O           0.05490600 0.70583300 0.00000000

#### NTO<sub>r</sub>

N           -0.19126100 1.31077600 0.00010300  
 C           0.30404400 0.04038500 0.00006600  
 N           -1.46449200 1.09343000 0.00008500  
 C           -1.76488100 -0.29229600 -0.00002700  
 N           -0.52927300 -0.94195100 0.00002100  
 H           -2.13298800 1.86027500 0.00012600  
 O           -2.87370900 -0.76614400 -0.00006000  
 N           1.76120500 -0.14532400 0.00009300  
 O           2.44225900 0.85234200 -0.00003500  
 O           2.16454500 -1.28211400 -0.00021500

#### NTO<sub>r</sub>'

N           -0.20876600 1.34429100 -0.00017700  
 C           0.32086000 0.11081700 -0.00009800  
 N           -1.49859900 1.21344700 0.00067100  
 C           -1.81736300 -0.16428100 -0.00086400  
 N           -0.58466000 -0.84138800 0.00010900  
 H           -0.43937100 -1.84622100 0.00053000  
 O           -2.91812300 -0.65442600 0.00005700  
 N           1.74992900 -0.13382000 -0.00004700  
 O           2.47266800 0.83322600 -0.00001800  
 O           2.09708800 -1.29263800 0.00013000

#### HOOH

H           -0.94925600 -0.89789800 0.00000000  
 O           0.00002200 -0.71540800 0.00000000  
 O           0.00002200 0.71526400 0.00000000  
 H           0.94889900 0.89904900 0.00000000

#### TS(NTO+HO<sub>2</sub><sup>•</sup>→INT1)

N           -0.21256300 -0.20453700 1.37770400  
 C           -0.69600900 -0.31051100 0.15028600

|   |             |             |             |
|---|-------------|-------------|-------------|
| N | 1.05340400  | -0.47773400 | 1.24367500  |
| C | 1.49604800  | -0.60626200 | -0.13842400 |
| N | 0.18756700  | -0.63220600 | -0.76750700 |
| H | 1.68363200  | -0.37411400 | 2.03434600  |
| O | 2.47663400  | -1.23850100 | -0.50665200 |
| N | -2.10731800 | -0.09111300 | -0.13568800 |
| O | -2.82970700 | 0.15208700  | 0.79875600  |
| O | -2.43088100 | -0.17100200 | -1.29729300 |
| O | 1.91763200  | 1.06385300  | -0.39396100 |
| O | 0.93939600  | 1.97648200  | -0.03879900 |
| H | 0.45581200  | 2.15217600  | -0.86159000 |
| H | 0.02809300  | -0.70164100 | -1.76762400 |

## INT1

|   |             |             |             |
|---|-------------|-------------|-------------|
| N | -0.36407800 | 1.23062500  | -0.66114300 |
| C | -0.80039700 | 0.17394300  | 0.03477400  |
| N | 0.90887000  | 1.24779000  | -0.47223100 |
| C | 1.46462200  | 0.19449100  | 0.50931700  |
| N | 0.10076800  | -0.50064500 | 0.67858100  |
| H | 1.46181000  | 2.01217900  | -0.85428600 |
| O | 2.01490500  | 0.62906100  | 1.53987300  |
| N | -2.22466600 | -0.15343900 | 0.05818700  |
| O | -2.96804300 | 0.56189900  | -0.56674200 |
| O | -2.53575900 | -1.12547000 | 0.70536900  |
| O | 2.32012200  | -0.67578800 | -0.22138900 |
| O | 1.70413300  | -1.10407900 | -1.42399500 |
| H | 1.39146600  | -1.99424100 | -1.20128900 |
| H | -0.06773600 | -1.28383600 | 1.30233800  |

TS(NTO+HO<sub>2</sub>\*→INT2)

|   |             |             |             |
|---|-------------|-------------|-------------|
| N | 0.14173500  | -0.25079300 | 1.37424900  |
| C | -0.35023900 | -0.20839500 | 0.13440000  |
| N | 1.44835900  | -0.37026800 | 1.18827700  |
| C | 1.81576300  | -0.56042300 | -0.14601000 |
| N | 0.59699600  | -0.52224400 | -0.79230700 |
| H | 2.08193900  | -0.39858200 | 1.97873600  |
| O | 2.92423400  | -0.72385400 | -0.59507200 |
| N | -1.76416200 | -0.53867700 | -0.08765700 |
| O | -2.52971700 | -0.29697900 | 0.81294600  |
| O | -2.05063600 | -0.99191300 | -1.17026000 |
| O | 0.49239400  | 2.25218800  | -0.28202400 |
| O | -0.71142800 | 1.65622100  | -0.09823000 |
| H | 0.69138000  | 2.15486500  | -1.22879000 |
| H | 0.47426300  | -0.53480300 | -1.79709700 |

## INT2

|   |             |             |             |
|---|-------------|-------------|-------------|
| N | 0.14798900  | 0.25279900  | 1.31996000  |
| C | -0.36326400 | 0.23871600  | -0.02488100 |
| N | 1.40854900  | -0.12070900 | 1.19071500  |
| C | 1.83742700  | -0.30082800 | -0.13273000 |
| N | 0.72073200  | -0.01464300 | -0.86746200 |
| H | 2.01289600  | -0.19507700 | 2.00088800  |
| O | 2.94090900  | -0.62214600 | -0.49367600 |
| N | -1.42819500 | -0.94644200 | -0.07830800 |
| O | -2.53322000 | -0.71835300 | 0.34339100  |
| O | -1.02073200 | -2.00917300 | -0.46848800 |

|   |             |             |             |
|---|-------------|-------------|-------------|
| O | -0.38607900 | 2.49650000  | -0.17471000 |
| O | -1.16649000 | 1.32851300  | -0.33829200 |
| H | -0.13136600 | 2.71014400  | -1.08695400 |
| H | 0.65486900  | -0.14216400 | -1.86841200 |

## INT3

|   |             |             |             |
|---|-------------|-------------|-------------|
| N | 0.12953800  | 1.35371100  | 0.00014500  |
| C | -0.38814400 | 0.15584400  | 0.00011900  |
| N | 1.48259700  | 1.10652500  | -0.00031600 |
| C | 1.79955100  | -0.21528500 | 0.00044400  |
| N | 0.56367100  | -0.82607700 | -0.00001000 |
| H | 0.39196900  | -1.82138500 | -0.00030500 |
| H | 2.14020200  | 1.87169900  | -0.00079400 |
| O | 2.90877300  | -0.74343800 | -0.00003700 |
| N | -1.73313800 | -0.13082400 | 0.00002300  |
| O | -2.58049200 | 0.83444100  | 0.00005700  |
| O | -2.09069300 | -1.36813100 | -0.00016700 |

O<sub>2</sub>

|   |            |            |             |
|---|------------|------------|-------------|
| O | 0.00000000 | 0.00000000 | 0.59379900  |
| O | 0.00000000 | 0.00000000 | -0.59379900 |

TS(INT2→INT4+NO<sub>2</sub>•)

|   |             |             |             |
|---|-------------|-------------|-------------|
| N | 0.14883200  | 0.40561500  | 1.27991600  |
| C | -0.28822000 | 0.48747000  | 0.00690300  |
| N | 1.42022200  | 0.05230100  | 1.16374600  |
| C | 1.88263200  | 0.02370100  | -0.15356900 |
| N | 0.76173300  | 0.38457500  | -0.86386000 |
| H | 1.98626500  | -0.13529300 | 1.98294100  |
| O | 2.99542800  | -0.24767300 | -0.53948500 |
| N | -1.16700400 | -1.35756800 | -0.10688000 |
| O | -2.32494700 | -1.47262300 | 0.18163200  |
| O | -0.37289400 | -2.22773100 | -0.32843100 |
| O | -1.21045000 | 2.52498100  | -0.26779100 |
| O | -1.44084700 | 1.11417800  | -0.31415500 |
| H | -1.56440900 | 2.75808800  | 0.60593100  |
| H | 0.69487400  | 0.38665700  | -1.87350400 |

## INT4

|   |             |             |             |
|---|-------------|-------------|-------------|
| N | 0.03898000  | 1.38276000  | 0.03022400  |
| C | 0.61162100  | 0.26070400  | -0.23131000 |
| N | -1.27881600 | 1.04376500  | 0.17584700  |
| C | -1.51663900 | -0.28960600 | 0.02248800  |
| N | -0.25786800 | -0.78946200 | -0.25016500 |
| H | -1.97305200 | 1.75231800  | 0.36248300  |
| O | -2.57777200 | -0.89730000 | 0.10205900  |
| O | 2.53711700  | -0.66610600 | 0.48056100  |
| O | 1.92107200  | 0.15425100  | -0.51786100 |
| H | 2.88015100  | -0.00436900 | 1.10313200  |
| H | -0.03639300 | -1.76073900 | -0.42210300 |

NO<sub>2</sub>•

|   |             |             |            |
|---|-------------|-------------|------------|
| N | 0.00000000  | 0.31564900  | 0.00000000 |
| O | 1.08972200  | -0.13834700 | 0.00000000 |
| O | -1.08972200 | -0.13784600 | 0.00000000 |

TS(INT4→INT5+H<sub>2</sub>O)

|   |             |             |             |
|---|-------------|-------------|-------------|
| N | 0.02049700  | 1.34297600  | -0.01636200 |
| C | 0.58844200  | 0.15636300  | -0.45162900 |
| N | -1.18442200 | 1.06994800  | 0.25297000  |
| C | -1.54028100 | -0.32190100 | 0.06968600  |
| N | -0.36668400 | -0.84486100 | -0.35008500 |
| H | -1.83488800 | 1.78770800  | 0.57297100  |
| O | -2.62870200 | -0.78616900 | 0.26533700  |
| O | 2.79638000  | -0.56332000 | 0.81453200  |
| O | 1.75255200  | 0.06265900  | -0.80565500 |
| H | 3.13176500  | 0.32955900  | 0.95661200  |
| H | -0.23341600 | -1.80584200 | -0.63730500 |

## INT5

|   |             |             |             |
|---|-------------|-------------|-------------|
| N | 0.64577000  | 1.24457800  | -0.00010900 |
| C | 1.10070200  | -0.25981100 | -0.00032700 |
| N | -0.55673900 | 1.16909800  | 0.00005300  |
| C | -1.07711400 | -0.33755500 | 0.00054400  |
| N | 0.02773700  | -1.05740100 | 0.00003400  |
| H | -1.15889000 | 2.00288300  | 0.00028200  |
| O | -2.25174300 | -0.52462200 | -0.00027500 |
| O | 2.27674200  | -0.46445500 | 0.00009600  |

H<sub>2</sub>O

|   |            |             |             |
|---|------------|-------------|-------------|
| H | 0.00000000 | 0.76115400  | -0.47140900 |
| O | 0.00000000 | 0.00000000  | 0.11785200  |
| H | 0.00000000 | -0.76115400 | -0.47140900 |

## TS(INT5→INT6)

|   |             |             |             |
|---|-------------|-------------|-------------|
| N | 0.82793400  | 1.20317500  | 0.00009100  |
| C | 1.06292300  | -0.29124100 | -0.00006100 |
| N | -0.36565200 | 1.39473600  | 0.00016300  |
| C | -1.19384900 | -0.45195200 | -0.00000800 |
| N | -0.07364600 | -1.03722100 | -0.00015400 |
| H | -0.64169400 | 2.38566600  | 0.00027000  |
| O | -2.35517900 | -0.42948300 | 0.00004100  |
| O | 2.19352800  | -0.67693500 | -0.00011000 |

## INT6

|   |             |             |             |
|---|-------------|-------------|-------------|
| N | 1.05936100  | 1.10864800  | 0.00065600  |
| C | 1.00334700  | -0.37287400 | -0.00008600 |
| N | -0.05299600 | 1.61174800  | -0.00033600 |
| C | -1.34650400 | -0.48448800 | 0.00000800  |
| N | -0.22684800 | -0.98561400 | -0.00054500 |
| H | 0.04019400  | 2.63692100  | 0.00030400  |
| O | -2.47209600 | -0.24135800 | 0.00035500  |
| O | 2.04236200  | -0.96316900 | -0.00013700 |

TS(INT6+H<sub>2</sub>O→INT7)

|   |             |             |             |
|---|-------------|-------------|-------------|
| N | 2.12618700  | -0.14262300 | -0.38354400 |
| C | 1.05068800  | 0.79015500  | -0.09658700 |
| N | 2.94207600  | -0.23098500 | 0.53100200  |
| C | -0.37614500 | -0.99856600 | -0.07890700 |
| N | -0.20744100 | 0.25488200  | 0.04348500  |
| H | 3.67828000  | -0.88484700 | 0.22822100  |
| O | -0.05124900 | -2.09447500 | -0.29552600 |

|   |             |             |             |
|---|-------------|-------------|-------------|
| O | 1.27419300  | 1.97351300  | -0.06139800 |
| O | -2.20046600 | -1.11060600 | 0.36004300  |
| H | -2.63538200 | -0.23935500 | 0.18082100  |
| H | -2.63154500 | -1.78182800 | -0.18629600 |
| O | -2.91198000 | 1.40978000  | -0.13049700 |
| H | -3.38706300 | 1.90468800  | 0.54638000  |
| H | -1.98128600 | 1.65719700  | -0.03373800 |

## INT7

|   |             |             |             |
|---|-------------|-------------|-------------|
| N | -1.37105400 | 0.66132100  | -0.45150300 |
| C | -0.91477900 | -0.65978300 | -0.07478400 |
| N | -2.11747000 | 1.16036300  | 0.38677700  |
| C | 1.40367800  | 0.17648500  | 0.00815000  |
| N | 0.44054600  | -0.81932900 | 0.01304200  |
| H | -2.45238000 | 2.05669800  | 0.00622100  |
| O | 1.18810000  | 1.36056600  | -0.03701200 |
| O | -1.69556700 | -1.57069600 | 0.03775500  |
| O | 2.60955500  | -0.38002500 | 0.06687100  |
| H | 0.76078100  | -1.77387000 | 0.13484400  |
| H | 3.27734600  | 0.32171400  | 0.07961100  |

TS(INT6+H<sub>2</sub>O→INT8)

|   |             |             |             |
|---|-------------|-------------|-------------|
| N | 0.12738900  | 1.32470700  | 0.08110500  |
| C | 0.26399800  | -0.17819900 | -0.08164700 |
| N | -1.02247100 | 1.73087600  | 0.03028300  |
| C | -2.12490800 | -0.59297200 | 0.02362300  |
| N | -0.97587000 | -0.88730600 | 0.23977500  |
| H | -1.00937400 | 2.75971700  | 0.06434700  |
| O | -3.27632100 | -0.47569200 | -0.13374500 |
| O | 0.80435600  | -0.45310800 | -1.20683800 |
| O | 1.18535900  | -0.55561000 | 1.02614300  |
| H | 2.35914300  | -0.31541500 | 0.57583500  |
| H | 0.94564500  | -0.15560600 | 1.87564100  |
| O | 3.23162900  | -0.18474900 | -0.13943500 |
| H | 3.68770600  | 0.66153700  | -0.01577600 |
| H | 2.71880900  | -0.14788200 | -0.97905100 |

## INT8

|   |             |             |             |
|---|-------------|-------------|-------------|
| N | -0.73172500 | 1.25649000  | -0.00116400 |
| C | -0.79670800 | -0.24128900 | -0.00195600 |
| N | 0.40048300  | 1.70478100  | -0.01385900 |
| C | 1.59011800  | -0.50941600 | -0.01636800 |
| N | 0.45092700  | -0.91370800 | -0.05917900 |
| H | 0.35082000  | 2.73275600  | -0.00516600 |
| O | 2.73870500  | -0.33235100 | 0.01110900  |
| O | -1.41150800 | -0.60855500 | 1.18396900  |
| O | -1.50585600 | -0.61002500 | -1.13236800 |
| H | -2.19889700 | -0.06265000 | 1.32121400  |
| H | -2.32090700 | -0.09136900 | -1.18838300 |

TS(INT6+H<sub>2</sub>O→INT9+N<sub>2</sub>H<sub>2</sub>)

|   |             |             |             |
|---|-------------|-------------|-------------|
| N | -0.55359500 | 0.94572300  | 0.12984500  |
| C | -0.16478200 | -0.53819500 | 0.22873500  |
| N | 0.37631600  | 1.73232100  | 0.15156900  |
| C | 2.19788800  | -0.18805100 | -0.27139000 |
| N | 1.14800900  | -0.75329200 | -0.43273900 |

|   |             |             |             |
|---|-------------|-------------|-------------|
| H | -0.00145500 | 2.68930400  | 0.18977300  |
| O | 3.27602400  | 0.25956900  | -0.20020600 |
| O | -0.25215000 | -0.93800100 | 1.43367500  |
| O | -1.13368400 | -1.12267500 | -0.68424500 |
| H | -2.55414600 | -0.40843900 | -0.49394600 |
| H | -3.60545200 | 0.78113300  | -0.89460000 |
| O | -3.06712900 | 0.41179900  | -0.17549400 |
| H | -2.26382900 | 1.00789400  | 0.01974600  |
| H | -1.15334600 | -2.07121900 | -0.49561200 |

## INT9

|   |             |             |             |
|---|-------------|-------------|-------------|
| C | -0.88062000 | 0.09952100  | 0.00008200  |
| C | 1.43148300  | -0.20698000 | -0.00019900 |
| N | 0.29466400  | -0.64893500 | 0.00039000  |
| O | 2.54087400  | 0.09347000  | -0.00011900 |
| O | -0.94957700 | 1.30145100  | 0.00008800  |
| O | -1.92047600 | -0.72200700 | -0.00007100 |
| H | -2.73439800 | -0.19601100 | -0.00121600 |

N<sub>2</sub>H<sub>2</sub>

|   |             |             |             |
|---|-------------|-------------|-------------|
| N | -0.61614600 | -0.11960700 | 0.00008200  |
| N | 0.61632700  | -0.11947700 | -0.00008200 |
| H | -1.00925700 | 0.83646700  | -0.00035300 |
| H | 1.00798600  | 0.83711900  | 0.00035200  |

TS(INT6→INT10+CO+N<sub>2</sub>)

|   |             |             |             |
|---|-------------|-------------|-------------|
| N | -2.18863200 | -0.16937200 | -0.00020700 |
| C | -0.56557100 | 0.81950200  | 0.00061600  |
| N | -1.87192400 | -1.27609300 | -0.00023100 |
| C | 1.58421900  | -0.44711300 | 0.00002800  |
| N | 0.37311300  | -0.44542500 | 0.00039800  |
| H | -0.55847100 | -1.25829200 | 0.00056500  |
| O | 2.74176200  | -0.39208800 | -0.00025300 |
| O | -0.20942600 | 1.92461200  | -0.00026600 |

## INT10

|   |             |             |             |
|---|-------------|-------------|-------------|
| C | 0.04265800  | 0.01519000  | -0.00004100 |
| N | -1.15647800 | -0.12520800 | 0.00001300  |
| O | 1.20550500  | 0.01659900  | 0.00001600  |
| H | -1.80464700 | 0.65252400  | 0.00002100  |

## CO

|   |            |            |             |
|---|------------|------------|-------------|
| C | 0.00000000 | 0.00000000 | -0.64144300 |
| O | 0.00000000 | 0.00000000 | 0.48108200  |

N<sub>2</sub>

|   |            |            |             |
|---|------------|------------|-------------|
| N | 0.00000000 | 0.00000000 | 0.54480100  |
| N | 0.00000000 | 0.00000000 | -0.54480100 |

TS(INT7→INT11+CO<sub>2</sub>)

|   |             |             |             |
|---|-------------|-------------|-------------|
| N | -1.22340000 | 0.74288100  | 0.00001000  |
| C | -0.96050300 | -0.76489300 | 0.00000500  |
| N | -2.36103100 | 1.16754700  | -0.00001000 |
| C | 1.94843800  | 0.25064100  | -0.00000300 |
| N | 0.32460100  | -0.94406200 | 0.00002300  |
| H | -2.35525200 | 2.19857300  | -0.00000300 |



|   |             |             |             |
|---|-------------|-------------|-------------|
| O | 2.81140800  | -0.54492500 | -0.00001300 |
| O | -1.95312400 | -1.47184000 | -0.00001300 |
| O | 1.52403400  | 1.35486500  | 0.00000000  |
| H | 0.57033000  | -1.93104300 | 0.00001900  |
| H | -0.38242500 | 1.34862000  | 0.00002900  |

## INT11

|   |             |             |             |
|---|-------------|-------------|-------------|
| N | 0.78758100  | -0.52380800 | 0.00000700  |
| C | -0.62668000 | 0.09646400  | -0.00000800 |
| N | 1.78427300  | 0.16851400  | -0.00000600 |
| N | -1.45731100 | -0.88548700 | 0.00003500  |
| H | 2.62736500  | -0.42277400 | 0.00000300  |
| O | -0.63570400 | 1.32476200  | -0.00003400 |
| H | -2.40655500 | -0.51506600 | 0.00004300  |
| H | 0.82309700  | -1.55357700 | 0.00002200  |

CO<sub>2</sub>

|   |            |            |             |
|---|------------|------------|-------------|
| C | 0.00000000 | 0.00000000 | 0.00000000  |
| O | 0.00000000 | 0.00000000 | 1.15522600  |
| O | 0.00000000 | 0.00000000 | -1.15522600 |

TS(INT7→INT12+CO<sub>2</sub>)

|   |             |             |             |
|---|-------------|-------------|-------------|
| N | 1.47622200  | -0.07714700 | 0.83388800  |
| C | 0.99775000  | -0.47481800 | -0.48598600 |
| N | 2.58814400  | 0.44101700  | 0.78593000  |
| C | -1.04034300 | 1.00863600  | -0.23198600 |
| N | -0.37693700 | -0.30050900 | -0.63015400 |
| H | 2.88037600  | 0.63591900  | 1.75383100  |
| O | -0.28699000 | 1.91165900  | 0.12046200  |
| O | 1.70071200  | -1.03686700 | -1.27745000 |
| O | -2.26991400 | 0.93656200  | -0.31921500 |
| H | -0.67992500 | -0.58192200 | -1.56264400 |
| H | -2.69060600 | -1.13358400 | 0.83464800  |
| O | -1.92808800 | -1.73848900 | 0.78218100  |
| H | -1.16472800 | -1.21540800 | 0.22106300  |
| H | -1.62731800 | -1.93435800 | 1.68546500  |

## INT12

|   |             |             |             |
|---|-------------|-------------|-------------|
| N | -0.79526300 | -0.66952600 | -0.00048600 |
| C | 0.45283100  | 0.14030500  | -0.00007500 |
| N | -1.79389200 | 0.04157100  | 0.00040800  |
| N | 1.50172800  | -0.67492100 | 0.00007000  |
| H | -2.61535400 | -0.57891400 | 0.00007300  |
| O | 0.46303500  | 1.35396000  | -0.00009300 |
| H | 2.43858600  | -0.29962200 | 0.00074600  |
| H | 1.36749800  | -1.67484800 | 0.00043500  |

TS(INT7→INT13+CO+N<sub>2</sub>)

|   |             |             |             |
|---|-------------|-------------|-------------|
| N | 2.02928400  | 0.82593400  | 0.00010100  |
| C | 0.96701000  | -0.84303400 | -0.00002400 |
| N | 1.44174400  | 1.81375600  | 0.00001000  |
| C | -1.29752800 | 0.04507000  | -0.00002100 |
| N | -0.46031400 | -0.99201800 | 0.00000300  |
| H | 0.14169500  | 1.58911400  | -0.00022000 |
| O | -0.95764400 | 1.25618500  | -0.00007800 |
| O | 1.61690300  | -1.85874200 | -0.00004600 |

|   |             |             |            |
|---|-------------|-------------|------------|
| H | -0.86627700 | -1.92781200 | 0.00012800 |
| O | -2.56659400 | -0.26571200 | 0.00006300 |
| H | -3.10863900 | 0.53893600  | 0.00004100 |

## INT13

|   |             |             |             |
|---|-------------|-------------|-------------|
| C | -0.10194000 | -0.02580000 | -0.00019600 |
| N | -1.30381700 | -0.42189000 | -0.00003500 |
| H | 0.62267400  | -1.76844400 | 0.00090900  |
| O | 0.94556300  | -0.85683300 | -0.00006900 |
| H | -1.93184600 | 0.37826200  | 0.00039300  |
| O | 0.27975800  | 1.25449200  | 0.00007200  |
| H | 1.24496200  | 1.31694400  | 0.00009600  |

TS(INT7→INT14+CO+N<sub>2</sub>)

|   |             |             |             |
|---|-------------|-------------|-------------|
| N | -2.32401900 | -0.38386700 | 0.15929900  |
| C | -0.96180700 | 0.84203000  | -0.04567200 |
| N | -1.88359800 | -1.40011600 | -0.19108600 |
| C | 1.30595500  | -0.26543400 | 0.09610600  |
| N | 0.16446800  | -0.13893500 | -0.68773100 |
| H | -0.64824600 | -1.08366100 | -0.57070000 |
| O | 1.25826700  | -0.53279300 | 1.27338200  |
| O | -0.75259400 | 1.96011500  | 0.19645900  |
| H | 0.34376100  | 0.10998800  | -1.65882600 |
| O | 2.41463100  | -0.03750900 | -0.59790200 |
| H | 3.17919400  | -0.14398300 | -0.01197100 |

## INT14

|   |             |             |             |
|---|-------------|-------------|-------------|
| C | -0.03079300 | 0.11038000  | -0.00000100 |
| N | 1.26130000  | -0.24168700 | 0.00005100  |
| H | 1.53920400  | -1.21003800 | -0.00014100 |
| O | -0.45112300 | 1.25795900  | -0.00000500 |
| H | 1.96568300  | 0.47785400  | -0.00013800 |
| O | -0.84759700 | -0.95814300 | -0.00000400 |
| H | -1.75946800 | -0.63681700 | 0.00000500  |

TS(INT11→INT10+N<sub>2</sub>H<sub>2</sub>)

|   |             |             |             |
|---|-------------|-------------|-------------|
| N | 0.99130900  | -0.56251700 | 0.00001600  |
| C | -0.90907300 | 0.15068100  | 0.00000200  |
| N | 1.91763400  | 0.22933400  | -0.00002200 |
| N | -1.52412200 | -0.93125800 | 0.00002600  |
| H | 2.83474200  | -0.24525600 | -0.00001800 |
| O | -0.72162300 | 1.31516400  | -0.00002500 |
| H | -2.53048900 | -0.76130500 | 0.00002200  |
| H | 1.22943100  | -1.56775000 | 0.00004600  |

TS(INT10+H<sub>2</sub>O→INT14)

|   |             |             |             |
|---|-------------|-------------|-------------|
| C | -1.46611500 | -0.32693100 | 0.07115500  |
| N | -0.57152200 | -1.20824800 | 0.16767900  |
| O | -2.59468400 | 0.02518200  | 0.18602900  |
| H | -0.98845200 | -2.06477600 | 0.53063000  |
| H | -1.11565200 | 1.86043000  | -0.45424500 |
| O | -0.58002600 | 1.06792900  | -0.59843300 |
| H | 0.31824700  | 1.21604000  | -0.16637900 |
| H | 2.29907000  | 2.04576100  | 0.10916600  |
| O | 1.76073900  | 1.35110500  | 0.50402700  |
| H | 2.17746700  | 0.50104400  | 0.25393600  |

|   |            |             |             |
|---|------------|-------------|-------------|
| O | 2.19665600 | -1.19339900 | -0.33143100 |
| H | 2.61558500 | -1.85422100 | 0.22934000  |
| H | 1.22961000 | -1.29149100 | -0.18467400 |

## INT14

|   |             |             |             |
|---|-------------|-------------|-------------|
| C | -0.03079300 | 0.11038000  | -0.00000100 |
| N | 1.26130000  | -0.24168700 | 0.00005100  |
| H | 1.53920400  | -1.21003800 | -0.00014100 |
| O | -0.45112300 | 1.25795900  | -0.00000500 |
| H | 1.96568300  | 0.47785400  | -0.00013800 |
| O | -0.84759700 | -0.95814300 | -0.00000400 |
| H | -1.75946800 | -0.63681700 | 0.00000500  |

TS(INT14→NH<sub>3</sub>+CO<sub>2</sub>)

|   |             |             |             |
|---|-------------|-------------|-------------|
| C | 1.24025700  | -0.16438900 | 0.02411400  |
| N | 0.64598600  | 0.89774500  | 0.77524100  |
| O | 2.24848300  | 0.09986300  | -0.64615400 |
| H | 1.28932400  | 1.66813000  | 0.91868100  |
| H | -0.92080800 | -1.28168500 | 0.08650800  |
| O | 0.64225100  | -1.27942200 | 0.07806500  |
| H | 0.27027400  | 0.57318500  | 1.66155900  |
| H | -1.72241400 | 1.56558000  | -1.25111900 |
| O | -1.70978400 | 1.28238300  | -0.32602000 |
| H | -0.74516900 | 1.32846100  | 0.02950300  |
| O | -1.91021800 | -1.09917000 | -0.04838400 |
| H | -2.37595800 | -1.35767300 | 0.75630900  |
| H | -1.92455900 | 0.17688800  | -0.23285700 |

NH<sub>3</sub>

|   |             |             |             |
|---|-------------|-------------|-------------|
| N | -0.00000100 | 0.00000700  | -0.11707800 |
| H | -0.85705800 | 0.38028400  | 0.27318900  |
| H | 0.75789800  | 0.55203300  | 0.27318800  |
| H | 0.09916600  | -0.93236700 | 0.27316700  |

TS(NO<sub>2</sub><sup>\*</sup>+HO<sub>2</sub><sup>\*</sup>→HNO<sub>2</sub>+O<sub>2</sub>)

|   |             |             |             |
|---|-------------|-------------|-------------|
| N | 0.86019300  | -0.12942200 | 0.00003500  |
| O | 1.97822100  | -0.50650400 | -0.00001600 |
| O | 0.51113800  | 1.05764200  | -0.00000900 |
| O | -1.75306300 | 0.32474900  | -0.00000100 |
| H | -0.79150600 | 0.90888300  | 0.00000500  |
| O | -1.39002800 | -0.87625300 | -0.00000500 |

HNO<sub>2</sub>

|   |             |             |             |
|---|-------------|-------------|-------------|
| N | 0.14458700  | 0.47875800  | -0.00009600 |
| O | -1.00216900 | -0.25587100 | -0.00008200 |
| O | 1.09072900  | -0.21254300 | 0.00007700  |
| H | -1.72058300 | 0.39600200  | 0.00071600  |

O<sub>2</sub>

|   |            |            |             |
|---|------------|------------|-------------|
| O | 0.00000000 | 0.00000000 | 0.59379900  |
| O | 0.00000000 | 0.00000000 | -0.59379900 |

## NTOa

|   |             |            |             |
|---|-------------|------------|-------------|
| N | -0.13372800 | 1.30609700 | -0.00001200 |
| C | 0.31491900  | 0.08067200 | 0.00000800  |
| N | -1.46473900 | 1.08068800 | 0.00010000  |

|   |             |             |             |
|---|-------------|-------------|-------------|
| C | -1.75975000 | -0.27043600 | -0.00036100 |
| N | -0.56606200 | -0.92463300 | 0.00010200  |
| H | -2.11815400 | 1.85145000  | 0.00039500  |
| O | -2.91269800 | -0.74723500 | 0.00005000  |
| N | 1.75143100  | -0.15063100 | 0.00004900  |
| O | 2.49071300  | 0.81351300  | -0.00008400 |
| O | 2.13183800  | -1.30296700 | 0.00003900  |

HO<sub>2</sub><sup>•</sup>

|   |             |             |            |
|---|-------------|-------------|------------|
| H | -0.87849200 | -0.88366200 | 0.00000000 |
| O | 0.05490600  | -0.59537500 | 0.00000000 |
| O | 0.05490600  | 0.70583300  | 0.00000000 |

TS(NTOa+HO<sub>2</sub><sup>•</sup>→INT1a)

|   |             |             |             |
|---|-------------|-------------|-------------|
| N | -0.21473500 | -0.32238800 | 1.34695200  |
| C | -0.65951400 | -0.32428300 | 0.07413000  |
| N | 1.04942100  | -0.61516200 | 1.18236500  |
| C | 1.42532900  | -0.65495500 | -0.21633400 |
| N | 0.17184900  | -0.55569300 | -0.88901600 |
| H | 1.69059800  | -0.58625700 | 1.96720800  |
| O | 2.42745100  | -1.25163900 | -0.63116900 |
| N | -2.08629000 | -0.07607300 | -0.16147800 |
| O | -2.79779900 | 0.08304000  | 0.80579100  |
| O | -2.45963200 | -0.04665700 | -1.31187700 |
| O | 1.93236800  | 1.09903100  | -0.35342700 |
| O | 1.00116800  | 2.01867300  | 0.13603900  |
| H | 0.44435100  | 2.22731600  | -0.62859800 |

## INT1a

|   |             |             |             |
|---|-------------|-------------|-------------|
| N | 0.36035100  | -1.09452600 | -0.88448500 |
| C | 0.74594600  | -0.17191700 | 0.03834600  |
| N | -0.92670000 | -1.14273400 | -0.69873500 |
| C | -1.40082200 | -0.28099300 | 0.46653600  |
| N | -0.10629600 | 0.36654600  | 0.82464900  |
| H | -1.48196100 | -1.84425500 | -1.17673100 |
| O | -2.02490300 | -0.89775200 | 1.38801000  |
| N | 2.18519900  | 0.14456300  | 0.10943000  |
| O | 2.92262100  | -0.39496200 | -0.68574400 |
| O | 2.53741900  | 0.92813800  | 0.96116400  |
| O | -2.27912000 | 0.73924000  | -0.08561800 |
| O | -1.65116200 | 1.43395600  | -1.15302900 |
| H | -1.21549500 | 2.17580500  | -0.70683400 |

TS(NTOa+HO<sub>2</sub><sup>•</sup>→INT2a)

|   |             |             |             |
|---|-------------|-------------|-------------|
| N | 0.15243300  | -0.30288100 | 1.36473900  |
| C | -0.30658900 | -0.24336600 | 0.08124800  |
| N | 1.44942700  | -0.41357700 | 1.15880500  |
| C | 1.76050300  | -0.55986600 | -0.21674800 |
| N | 0.57979700  | -0.50317500 | -0.88208800 |
| H | 2.09841700  | -0.46341500 | 1.93504000  |
| O | 2.90186600  | -0.71431300 | -0.64139600 |
| N | -1.74503800 | -0.51871300 | -0.11988200 |
| O | -2.48774700 | -0.31654800 | 0.81547900  |
| O | -2.09386500 | -0.89478400 | -1.21492000 |
| O | 0.54283500  | 2.20780400  | -0.26723500 |
| O | -0.68803700 | 1.64873800  | -0.01362400 |

|   |            |            |             |
|---|------------|------------|-------------|
| H | 0.72135000 | 2.00404900 | -1.19949200 |
|---|------------|------------|-------------|

## INT2a

|   |             |             |             |
|---|-------------|-------------|-------------|
| N | 0.16307000  | 0.26302700  | 1.29657700  |
| C | -0.29312100 | 0.23578300  | -0.07800400 |
| N | 1.41121500  | -0.13739800 | 1.16761700  |
| C | 1.79443700  | -0.31141900 | -0.20315900 |
| N | 0.72584100  | -0.05080200 | -0.95607000 |
| H | 2.02746200  | -0.20294600 | 1.96855000  |
| O | 2.93840600  | -0.63773200 | -0.51327200 |
| N | -1.42420100 | -0.93465800 | -0.08470300 |
| O | -2.53324400 | -0.67122600 | 0.32152300  |
| O | -1.05352300 | -2.03405700 | -0.41365800 |
| O | -0.31624500 | 2.49310100  | -0.35258400 |
| O | -1.12336300 | 1.33114600  | -0.39104400 |
| H | -0.46307900 | 2.82571700  | 0.54676600  |

## INT3a

|   |             |             |             |
|---|-------------|-------------|-------------|
| N | -0.22652900 | 1.32743400  | 0.00002000  |
| C | 0.27762800  | 0.05485500  | -0.00003500 |
| N | -1.51117000 | 1.18402100  | -0.00028400 |
| C | -1.77570700 | -0.21092400 | 0.00058300  |
| N | -0.57546400 | -0.92040700 | -0.00014400 |
| O | -2.90458100 | -0.69076200 | -0.00017200 |
| N | 1.71701800  | -0.14835500 | -0.00007800 |
| O | 2.42684900  | 0.83704000  | 0.00016500  |
| O | 2.12291700  | -1.29158200 | 0.00002200  |

TS(INT2a→INT4a+NO<sub>2</sub><sup>-</sup>)

|   |             |             |             |
|---|-------------|-------------|-------------|
| N | 0.18893700  | 0.37461200  | 1.27578000  |
| C | -0.18942600 | 0.47080900  | -0.06962000 |
| N | 1.41860400  | -0.06604700 | 1.16680400  |
| C | 1.84708000  | -0.12404500 | -0.18991500 |
| N | 0.79469700  | 0.28617700  | -0.94431800 |
| H | 1.98264800  | -0.27023700 | 1.98383600  |
| O | 2.96925900  | -0.47482000 | -0.52066800 |
| N | -1.29322900 | -1.19245200 | -0.11608200 |
| O | -2.42520600 | -1.24857400 | 0.33111900  |
| O | -0.68114700 | -2.17752700 | -0.47819600 |
| O | -0.88361400 | 2.60228000  | -0.30632600 |
| O | -1.29195700 | 1.23590400  | -0.36024100 |
| H | -1.19032000 | 2.87552400  | 0.57258000  |

## INT4a

|   |             |             |             |
|---|-------------|-------------|-------------|
| N | 0.28026500  | 1.09225300  | -0.00231800 |
| C | 0.51760700  | -0.26920700 | -0.00042800 |
| N | -1.02083400 | 1.12275500  | -0.00238300 |
| C | -1.58390200 | -0.18445400 | -0.00193200 |
| N | -0.51563100 | -1.05678700 | 0.00088700  |
| H | -1.52980300 | 2.00118200  | -0.00367500 |
| O | -2.77075700 | -0.41340800 | -0.00248500 |
| O | 2.72643600  | 0.23348600  | 0.11044100  |
| O | 1.74607800  | -0.77452900 | -0.00450200 |
| H | 3.10691200  | 0.24884200  | -0.78310000 |

NO<sub>2</sub><sup>-</sup>

|   |             |             |            |
|---|-------------|-------------|------------|
| N | 0.00000000  | 0.45926700  | 0.00000000 |
| O | 1.05332200  | -0.20083000 | 0.00000000 |
| O | -1.05332200 | -0.20102900 | 0.00000000 |

TS(INT3a→INT5a+N<sub>2</sub>)

|   |             |             |             |
|---|-------------|-------------|-------------|
| N | -0.72109500 | 1.79252800  | 0.00030700  |
| C | 0.42928200  | 0.12177300  | 0.00020600  |
| N | -1.76370200 | 1.33804400  | 0.00025500  |
| C | -1.71886800 | -0.59379800 | -0.00013100 |
| N | -0.44668300 | -0.83363000 | -0.00056900 |
| O | -2.78556700 | -1.08087300 | -0.00008500 |
| N | 1.76782500  | -0.13652900 | -0.00001500 |
| O | 2.54719300  | 0.86141500  | -0.00059800 |
| O | 2.22376100  | -1.31688500 | 0.00064600  |

## INT5a

|   |             |             |             |
|---|-------------|-------------|-------------|
| C | -0.27510800 | -0.80914000 | -0.00015900 |
| C | 2.01737500  | -0.04622200 | 0.00002800  |
| N | 0.81562300  | 0.02861200  | 0.00017600  |
| O | 3.18012000  | 0.01285900  | -0.00004300 |
| N | -1.43054400 | -0.01217000 | -0.00005200 |
| O | -2.52797300 | -0.63151200 | 0.00007500  |
| O | -1.42079200 | 1.24578800  | -0.00004200 |

N<sub>2</sub>

|   |            |            |             |
|---|------------|------------|-------------|
| N | 0.00000000 | 0.00000000 | 0.54480100  |
| N | 0.00000000 | 0.00000000 | -0.54480100 |

TS(INT4a→INT5+OH<sup>•</sup>)

|   |             |             |             |
|---|-------------|-------------|-------------|
| N | -0.06734000 | 1.29173000  | -0.10288700 |
| C | -0.55700700 | -0.02546600 | -0.40090300 |
| N | 1.13290900  | 1.10134700  | 0.14750200  |
| C | 1.50247300  | -0.34430300 | 0.05419100  |
| N | 0.35971700  | -0.97048800 | -0.28866600 |
| H | 1.76587400  | 1.87010800  | 0.38090400  |
| O | 2.62559300  | -0.71655400 | 0.26674200  |
| O | -2.64359600 | -0.40427400 | 0.77002300  |
| O | -1.77959400 | -0.14094500 | -0.71097200 |
| H | -3.03489900 | 0.48456400  | 0.80137800  |

## INT5

|   |             |             |             |
|---|-------------|-------------|-------------|
| N | -0.64526400 | 1.24483900  | 0.00031000  |
| C | -1.10068500 | -0.26089100 | -0.00004900 |
| N | 0.55716600  | 1.16891900  | -0.00016300 |
| C | 1.07708300  | -0.33687600 | 0.00008900  |
| N | -0.02790200 | -1.05764500 | 0.00040500  |
| H | 1.15984200  | 2.00234100  | -0.00010800 |
| O | 2.25136800  | -0.52500500 | -0.00021400 |
| O | -2.27714600 | -0.46356000 | -0.00028500 |

OH<sup>•</sup>

|   |            |            |             |
|---|------------|------------|-------------|
| O | 0.00000000 | 0.00000000 | 0.10827300  |
| H | 0.00000000 | 0.00000000 | -0.86618500 |

## TS(INT5→INT6)

|   |            |            |            |
|---|------------|------------|------------|
| N | 0.82793400 | 1.20317500 | 0.00009100 |
|---|------------|------------|------------|

|   |             |             |             |
|---|-------------|-------------|-------------|
| C | 1.06292300  | -0.29124100 | -0.00006100 |
| N | -0.36565200 | 1.39473600  | 0.00016300  |
| C | -1.19384900 | -0.45195200 | -0.00000800 |
| N | -0.07364600 | -1.03722100 | -0.00015400 |
| H | -0.64169400 | 2.38566600  | 0.00027000  |
| O | -2.35517900 | -0.42948300 | 0.00004100  |
| O | 2.19352800  | -0.67693500 | -0.00011000 |

## INT6

|   |             |             |             |
|---|-------------|-------------|-------------|
| N | 1.05936100  | 1.10864800  | 0.00065600  |
| C | 1.00334700  | -0.37287400 | -0.00008600 |
| N | -0.05299600 | 1.61174800  | -0.00033600 |
| C | -1.34650400 | -0.48448800 | 0.00000800  |
| N | -0.22684800 | -0.98561400 | -0.00054500 |
| H | 0.04019400  | 2.63692100  | 0.00030400  |
| O | -2.47209600 | -0.24135800 | 0.00035500  |
| O | 2.04236200  | -0.96316900 | -0.00013700 |

TS(INT6+OH<sup>\*</sup>→INT6a+N<sub>2</sub>+H<sub>2</sub>O)

|   |             |             |             |
|---|-------------|-------------|-------------|
| N | -0.67680700 | -0.84576100 | -0.00335300 |
| C | 0.79174000  | -1.12159300 | -0.00022500 |
| N | -0.93114900 | 0.33730000  | -0.00180200 |
| C | 1.42725100  | 1.14864100  | 0.00081700  |
| N | 1.65435400  | -0.05583100 | 0.00119300  |
| H | -1.98385900 | 0.50192700  | -0.00474500 |
| O | 1.43594000  | 2.29919700  | 0.00077100  |
| O | 1.13076700  | -2.26480400 | 0.00058200  |
| O | -3.55434600 | 0.44046400  | -0.00186900 |
| H | -3.75375600 | -0.51302000 | 0.03304700  |

## INT6a

|   |             |             |             |
|---|-------------|-------------|-------------|
| C | 1.14779300  | -0.35107100 | -0.00005500 |
| C | -1.15452000 | 0.06329100  | -0.00029800 |
| N | 0.01469600  | 0.42554200  | 0.00006200  |
| O | -2.28138600 | -0.15530200 | 0.00015100  |
| O | 2.27357200  | -0.00121200 | 0.00005900  |

TS(INT6a+H<sub>2</sub>O→INT7a)

|   |             |             |             |
|---|-------------|-------------|-------------|
| C | 1.89040300  | 0.11734400  | -0.01293600 |
| C | 0.01273600  | -1.07989900 | -0.02318000 |
| N | 0.52212800  | 0.07717600  | 0.12242400  |
| O | 0.00929600  | -2.22017200 | -0.22620600 |
| O | 2.60133600  | 1.06390300  | 0.05941600  |
| O | -1.82343900 | -0.63440500 | 0.32978700  |
| H | -2.40429100 | -1.16528200 | -0.23168900 |
| H | -0.80200800 | 1.98428300  | -0.12507400 |
| O | -1.75953900 | 1.97759600  | -0.25944100 |
| H | -1.97331500 | 0.31664900  | 0.10712500  |
| H | -2.11534100 | 2.60407100  | 0.38091600  |

## INT7a

|   |             |             |             |
|---|-------------|-------------|-------------|
| C | 1.45322100  | 0.26147200  | 0.00000800  |
| C | -0.92469100 | 0.10818500  | -0.00008600 |
| N | 0.32959000  | -0.48787100 | -0.00016600 |
| O | -1.11264200 | 1.29764600  | -0.00000100 |
| O | 2.58738900  | -0.08674000 | 0.00010400  |

|   |             |             |             |
|---|-------------|-------------|-------------|
| O | -1.86697800 | -0.82402400 | 0.00016300  |
| H | -2.73508400 | -0.39409900 | -0.00009500 |
| H | 0.39463400  | -1.50380000 | -0.00039900 |

## INT10

|   |             |             |             |
|---|-------------|-------------|-------------|
| C | 0.04265800  | 0.01519000  | -0.00004100 |
| N | -1.15647800 | -0.12520800 | 0.00001300  |
| O | 1.20550500  | 0.01659900  | 0.00001600  |
| H | -1.80464700 | 0.65252400  | 0.00002100  |

## HOOH

|   |             |             |            |
|---|-------------|-------------|------------|
| H | -0.94925600 | -0.89789800 | 0.00000000 |
| O | 0.00002200  | -0.71540800 | 0.00000000 |
| O | 0.00002200  | 0.71526400  | 0.00000000 |
| H | 0.94889900  | 0.89904900  | 0.00000000 |

CO<sub>2</sub>

|   |            |            |             |
|---|------------|------------|-------------|
| C | 0.00000000 | 0.00000000 | 0.00000000  |
| O | 0.00000000 | 0.00000000 | 1.15522600  |
| O | 0.00000000 | 0.00000000 | -1.15522600 |

TS(INT10+H<sub>2</sub>O→INT14)

|   |             |             |             |
|---|-------------|-------------|-------------|
| C | -1.46611500 | -0.32693100 | 0.07115500  |
| N | -0.57152200 | -1.20824800 | 0.16767900  |
| O | -2.59468400 | 0.02518200  | 0.18602900  |
| H | -0.98845200 | -2.06477600 | 0.53063000  |
| H | -1.11565200 | 1.86043000  | -0.45424500 |
| O | -0.58002600 | 1.06792900  | -0.59843300 |
| H | 0.31824700  | 1.21604000  | -0.16637900 |
| H | 2.29907000  | 2.04576100  | 0.10916600  |
| O | 1.76073900  | 1.35110500  | 0.50402700  |
| H | 2.17746700  | 0.50104400  | 0.25393600  |
| O | 2.19665600  | -1.19339900 | -0.33143100 |
| H | 2.61558500  | -1.85422100 | 0.22934000  |
| H | 1.22961000  | -1.29149100 | -0.18467400 |

## INT14

|   |             |             |             |
|---|-------------|-------------|-------------|
| C | -0.03079300 | 0.11038000  | -0.00000100 |
| N | 1.26130000  | -0.24168700 | 0.00005100  |
| H | 1.53920400  | -1.21003800 | -0.00014100 |
| O | -0.45112300 | 1.25795900  | -0.00000500 |
| H | 1.96568300  | 0.47785400  | -0.00013800 |
| O | -0.84759700 | -0.95814300 | -0.00000400 |
| H | -1.75946800 | -0.63681700 | 0.00000500  |

TS(INT14→NH<sub>3</sub>+CO<sub>2</sub>)

|   |             |             |             |
|---|-------------|-------------|-------------|
| C | 1.24025700  | -0.16438900 | 0.02411400  |
| N | 0.64598600  | 0.89774500  | 0.77524100  |
| O | 2.24848300  | 0.09986300  | -0.64615400 |
| H | 1.28932400  | 1.66813000  | 0.91868100  |
| H | -0.92080800 | -1.28168500 | 0.08650800  |
| O | 0.64225100  | -1.27942200 | 0.07806500  |
| H | 0.27027400  | 0.57318500  | 1.66155900  |
| H | -1.72241400 | 1.56558000  | -1.25111900 |
| O | -1.70978400 | 1.28238300  | -0.32602000 |
| H | -0.74516900 | 1.32846100  | 0.02950300  |



|   |             |             |             |
|---|-------------|-------------|-------------|
| O | -1.91021800 | -1.09917000 | -0.04838400 |
| H | -2.37595800 | -1.35767300 | 0.75630900  |
| H | -1.92455900 | 0.17688800  | -0.23285700 |

NH<sub>3</sub>

|   |             |             |             |
|---|-------------|-------------|-------------|
| N | -0.00000100 | 0.00000700  | -0.11707800 |
| H | -0.85705800 | 0.38028400  | 0.27318900  |
| H | 0.75789800  | 0.55203300  | 0.27318800  |
| H | 0.09916600  | -0.93236700 | 0.27316700  |

TS(NTO\*+HO<sub>2</sub>\*→INT1)

|   |             |             |             |
|---|-------------|-------------|-------------|
| N | -0.63779100 | 1.48310800  | -0.37825100 |
| C | -0.94648100 | 0.20122700  | 0.03687300  |
| N | 0.65307100  | 1.58051200  | -0.11822300 |
| C | 1.26299600  | 0.36331900  | 0.34075800  |
| N | 0.09885600  | -0.46378500 | 0.48439000  |
| H | 1.17173000  | 2.41976500  | -0.35642200 |
| O | 2.16912600  | 0.39542800  | 1.26770300  |
| N | -2.20550500 | -0.31821500 | 0.00510600  |
| O | -3.14552900 | 0.41901000  | -0.42783800 |
| O | -2.36829900 | -1.51727800 | 0.41187600  |
| O | 2.13188200  | -0.13230500 | -0.79336800 |
| O | 2.24768200  | -1.50534400 | -0.72578300 |
| H | 3.19745100  | -1.64225700 | -0.56848200 |
| H | 0.09241200  | -1.41222000 | 0.84724700  |

TS(NTO\*+HO<sub>2</sub>\*→INT2)

|   |             |             |             |
|---|-------------|-------------|-------------|
| N | 0.18791600  | -0.35148400 | 1.35142400  |
| C | -0.33537300 | -0.30256500 | 0.11488700  |
| N | 1.50111300  | -0.39539700 | 1.13600300  |
| C | 1.85090400  | -0.52058700 | -0.20500600 |
| N | 0.62336100  | -0.53151500 | -0.83416200 |
| H | 2.15136700  | -0.39906200 | 1.91241300  |
| O | 2.95965200  | -0.60081300 | -0.68090800 |
| N | -1.67352900 | -0.72506000 | -0.08920300 |
| O | -2.53686500 | -0.45407000 | 0.85732700  |
| O | -2.19262200 | -0.57965100 | -1.26351900 |
| O | 0.40435400  | 2.27020600  | -0.04056300 |
| O | -0.75637700 | 1.56671900  | -0.06495500 |
| H | 0.76181000  | 2.21336500  | -0.94261800 |
| H | 0.49647000  | -0.47032300 | -1.83657600 |

TS(NTO<sub>r</sub>+HO<sub>2</sub>\*→INT15)

|   |             |             |             |
|---|-------------|-------------|-------------|
| N | -0.32506700 | -1.01489200 | 0.97690100  |
| C | -0.74151200 | -0.23320500 | -0.04991800 |
| N | 0.94320400  | -1.14445300 | 0.71716400  |
| C | 1.33381200  | -0.36617300 | -0.42939800 |
| N | 0.11577800  | 0.15971600  | -0.92887000 |
| H | 1.56384200  | -1.66321800 | 1.33120200  |
| O | 2.22020300  | -0.86350800 | -1.25229900 |
| N | -2.16795800 | 0.11365700  | -0.13735300 |
| O | -2.89114300 | -0.30047900 | 0.73733000  |
| O | -2.50825700 | 0.78582300  | -1.08025700 |
| O | 2.21924400  | 0.86759700  | 0.12610900  |
| O | 1.44990300  | 1.53936100  | 1.04653700  |
| H | 1.00104500  | 2.23092900  | 0.53043800  |

## INT15

|   |             |             |             |
|---|-------------|-------------|-------------|
| N | 0.70283500  | 1.59033400  | 0.01177900  |
| C | 0.68761300  | 0.17132200  | -0.15782000 |
| N | -0.34222800 | 1.99192500  | 0.52068300  |
| C | -1.55885400 | -0.20022500 | -0.62635600 |
| N | -0.23564500 | -0.61136500 | -0.42364500 |
| H | -0.29560500 | 3.01954300  | 0.55954000  |
| O | -1.97866600 | 0.25211400  | -1.64845600 |
| N | 2.07641000  | -0.41590700 | -0.05737700 |
| O | 2.90897800  | 0.27823600  | 0.47208700  |
| O | 2.24002500  | -1.52859300 | -0.48322300 |
| O | -2.41489700 | -0.48848600 | 0.37522100  |
| O | -1.75350600 | -0.87526200 | 1.56045000  |
| H | -1.90202800 | -1.83512000 | 1.57679500  |

TS(NTOr+HO<sub>2</sub><sup>•</sup>→INT16)

|   |             |             |             |
|---|-------------|-------------|-------------|
| N | 0.22706000  | 0.06238300  | 1.32561600  |
| C | -0.30318500 | -0.11400000 | 0.04866500  |
| N | 1.50759500  | -0.16932600 | 1.12149300  |
| C | 1.78321800  | -0.62066000 | -0.17371700 |
| N | 0.54276300  | -0.68424800 | -0.83979500 |
| H | 2.18009500  | -0.08409100 | 1.87722600  |
| O | 2.85746800  | -0.92704900 | -0.62180800 |
| N | -1.74763800 | -0.53777600 | 0.00051700  |
| O | -2.36128700 | -0.51604800 | 1.03554200  |
| O | -2.17632700 | -0.83990800 | -1.08387300 |
| O | 0.26208700  | 2.31010600  | -0.10158000 |
| O | -0.54441700 | 1.38428400  | -0.67838300 |
| H | 0.93105400  | 2.50373200  | -0.78091400 |

## INT16

|   |             |             |             |
|---|-------------|-------------|-------------|
| N | 0.17690400  | 0.09776200  | 1.37538800  |
| C | -0.33455900 | 0.23210500  | -0.07439600 |
| N | 1.32502000  | -0.24201200 | 1.24549000  |
| C | 1.76639500  | -0.37421200 | -0.33578300 |
| N | 0.67581200  | -0.03586900 | -0.95407100 |
| H | 1.91905400  | -0.39931600 | 2.07061300  |
| O | 2.88512000  | -0.71096600 | -0.56537700 |
| N | -1.48144700 | -0.84790400 | -0.12013300 |
| O | -1.12836700 | -1.97060200 | -0.36088600 |
| O | -2.60251400 | -0.48170200 | 0.11321200  |
| O | -0.08029100 | 2.47536100  | -0.14774000 |
| O | -1.02111200 | 1.42205500  | -0.20931500 |
| H | 0.19321900  | 2.57494900  | -1.07540300 |

TS(NTOr+H<sub>2</sub>O→INT17)

|   |             |             |             |
|---|-------------|-------------|-------------|
| N | -1.10814000 | 1.43010900  | -0.19550800 |
| C | -1.11937400 | 0.08925600  | 0.04178000  |
| N | 0.16618600  | 1.70680600  | -0.13220200 |
| C | 0.96246200  | 0.54412400  | 0.35751700  |
| N | -0.03157500 | -0.53180800 | 0.30686400  |
| H | 0.47029800  | 2.67285400  | -0.05915600 |
| O | 1.71038100  | 0.68448800  | 1.33038000  |
| N | -2.42038200 | -0.60490700 | -0.01893200 |
| O | -3.37422400 | 0.03183800  | -0.40314200 |

|   |             |             |             |
|---|-------------|-------------|-------------|
| O | -2.44079900 | -1.76457800 | 0.31881800  |
| H | 2.67068100  | -0.43626100 | -0.67850800 |
| O | 1.90754100  | 0.24424800  | -0.96293100 |
| H | 1.41146400  | -0.09910900 | -1.72136600 |
| H | 4.53651300  | -0.89508200 | -0.04583800 |
| O | 3.71503300  | -1.33922100 | -0.29164100 |
| H | 3.46644000  | -1.89828300 | 0.45565500  |

## INT17

|   |             |             |             |
|---|-------------|-------------|-------------|
| N | 0.17594200  | 1.37001300  | 0.00932400  |
| C | 0.62415200  | 0.10899700  | 0.01209500  |
| N | -1.10796500 | 1.26624200  | 0.00727900  |
| C | -1.68981900 | -0.18118900 | -0.11668800 |
| N | -0.27113200 | -0.82621100 | -0.00346400 |
| H | -1.67232800 | 2.10925700  | -0.07096900 |
| O | -2.29589400 | -0.40151200 | -1.18817200 |
| N | 2.06272400  | -0.15249200 | 0.00362200  |
| O | 2.39171000  | -1.31543400 | -0.02536400 |
| O | 2.80246700  | 0.80077300  | 0.02758100  |
| O | -2.39799600 | -0.47618000 | 1.03828900  |
| H | -1.86241600 | -0.31706800 | 1.82816300  |
| H | -0.09053100 | -1.82308300 | -0.06563400 |

TS(NTOr+H<sub>2</sub>O→INT18)

|   |             |             |             |
|---|-------------|-------------|-------------|
| N | 0.49830100  | -1.34247000 | 0.87885900  |
| C | -0.15629400 | -0.34011500 | 0.13171700  |
| N | 1.75101500  | -1.09235000 | 0.58647900  |
| C | 1.88864800  | -0.04545400 | -0.37696600 |
| N | 0.63058700  | 0.37173700  | -0.67697600 |
| H | 2.50238600  | -1.64960900 | 0.97805700  |
| O | 2.96378700  | 0.32431100  | -0.80603500 |
| N | -1.50117200 | -0.78172400 | -0.45068300 |
| O | -1.93188500 | -1.85537800 | -0.11258700 |
| O | -2.03421300 | -0.01283400 | -1.21162700 |
| H | -0.42501600 | 0.54231300  | 2.14504200  |
| O | -0.91442300 | 0.64204300  | 1.31246100  |
| H | -0.81219200 | 1.62049400  | 0.96521100  |
| H | -1.35905400 | 3.34071200  | -0.02282200 |
| O | -0.56307300 | 2.87677800  | 0.26536100  |
| H | -0.11291300 | 2.57379100  | -0.53834000 |

## INT18

|   |             |             |             |
|---|-------------|-------------|-------------|
| N | 0.13229300  | -0.76084300 | -1.18232000 |
| C | -0.38712100 | -0.57876100 | 0.15557200  |
| N | 1.36156500  | -0.27490200 | -1.11654400 |
| C | 1.77548200  | 0.10664600  | 0.16662100  |
| N | 0.69171800  | -0.17321500 | 0.95121400  |
| H | 1.96678100  | -0.28425900 | -1.92921000 |
| O | 2.85164900  | 0.55824200  | 0.46980800  |
| N | -1.42918400 | 0.65815100  | -0.00808800 |
| O | -0.96704500 | 1.77045800  | -0.04278500 |
| O | -2.59308300 | 0.37193800  | -0.14985000 |
| H | -1.82225300 | -1.84325300 | 0.06990700  |
| O | -1.08831300 | -1.61535200 | 0.66102400  |
| H | 0.60489000  | 0.13357600  | 1.91074000  |

TS(NTOr+H<sub>2</sub>O→INT19)

|   |             |             |             |
|---|-------------|-------------|-------------|
| N | -0.16768800 | -0.65715600 | 0.96290300  |
| C | -0.09083300 | 0.27528800  | -0.09660300 |
| N | -1.43044300 | -0.99561200 | 0.90231300  |
| C | -2.14811400 | -0.24133800 | -0.07812200 |
| N | -1.24869300 | 0.60293600  | -0.65233400 |
| H | -1.82437100 | -1.66944500 | 1.54986800  |
| O | -3.33764900 | -0.38055100 | -0.28108400 |
| N | 0.91154300  | 1.38950100  | 0.20167400  |
| O | 1.97192000  | 1.05278200  | 0.67197200  |
| O | 0.56656000  | 2.51868500  | -0.02901400 |
| H | 0.35203000  | -0.93789000 | -1.87037000 |
| O | 0.94851800  | -0.45979900 | -1.27262400 |
| H | 1.58921700  | -1.13821900 | -0.82707200 |
| H | 2.31143800  | -2.08259200 | 0.82138000  |
| O | 2.49166800  | -2.09263200 | -0.12757700 |
| H | 3.42419100  | -1.86110500 | -0.22072600 |

## INT19

|   |             |             |             |
|---|-------------|-------------|-------------|
| N | -0.31611600 | -0.31894500 | 1.30091400  |
| C | 0.35635800  | -0.59056700 | 0.03701300  |
| N | -1.49877800 | 0.14109700  | 1.02259300  |
| C | -1.69569600 | 0.06899300  | -0.43529400 |
| N | -0.57727900 | -0.39507000 | -0.96993000 |
| H | -2.16425500 | 0.39997900  | 1.74695100  |
| O | -2.76307000 | 0.40298300  | -0.91228300 |
| N | 1.47307500  | 0.58625900  | -0.09928000 |
| O | 2.51130100  | 0.29609800  | -0.63501600 |
| O | 1.15757400  | 1.69134500  | 0.27295700  |
| H | 0.98357900  | -2.17159600 | -0.79380000 |
| O | 1.03990600  | -1.75252000 | 0.07695300  |
| H | 0.08469300  | -0.29558400 | 2.23556400  |

TS(NTOr+H<sub>2</sub>O→INT20+HNO<sub>2</sub>)

|   |             |             |             |
|---|-------------|-------------|-------------|
| N | 0.30144400  | 0.44358700  | 1.31232300  |
| C | -0.20604000 | 0.51095100  | -0.01368600 |
| N | 1.52211200  | 0.00653100  | 1.08956900  |
| C | 1.82225500  | -0.08398900 | -0.30694600 |
| N | 0.70343900  | 0.27775100  | -0.97638500 |
| H | 2.17634300  | -0.12903900 | 1.85176100  |
| O | 2.91506600  | -0.42447800 | -0.72319200 |
| N | -1.47115100 | -0.65559200 | -0.05285800 |
| O | -1.24087900 | -1.81297900 | 0.02275400  |
| O | -2.60110400 | -0.15319100 | -0.16040700 |
| H | -0.90194700 | 2.10296300  | -1.00252100 |
| O | -1.10767300 | 1.62202200  | -0.17797200 |
| H | -2.08588200 | 1.10737300  | -0.22346100 |

## INT20

|   |             |             |             |
|---|-------------|-------------|-------------|
| N | 0.59122600  | 1.21786800  | 0.00038300  |
| C | 0.99252000  | -0.11205600 | 0.00006000  |
| N | -0.70551300 | 1.10147100  | -0.00052100 |
| C | -1.11513200 | -0.26036600 | -0.00005800 |
| N | 0.04295200  | -1.00588800 | 0.00012700  |
| H | -1.31320400 | 1.91417100  | 0.00061300  |
| O | -2.27080500 | -0.62103400 | 0.00007700  |

|   |            |             |             |
|---|------------|-------------|-------------|
| H | 2.46123500 | -1.28059500 | -0.00045000 |
| O | 2.28167800 | -0.32811800 | -0.00008900 |

TS(INT18→INT21+NO<sub>2</sub>\*)

|   |             |             |             |
|---|-------------|-------------|-------------|
| N | 0.15726700  | 0.74516600  | 1.22472700  |
| C | -0.21834800 | 0.91950000  | -0.07614000 |
| N | 1.28315500  | 0.05064600  | 1.13698800  |
| C | 1.73766000  | -0.13571500 | -0.16939200 |
| N | 0.77245300  | 0.50651000  | -0.91493700 |
| H | 1.75813100  | -0.27947100 | 1.96893200  |
| O | 2.73470900  | -0.71174000 | -0.52964500 |
| N | -1.44483100 | -0.76525800 | -0.06337000 |
| O | -0.90977400 | -1.85150200 | -0.08175100 |
| O | -2.63964100 | -0.58762700 | 0.01515500  |
| H | -1.67489400 | 2.06128500  | 0.26886200  |
| O | -1.09874900 | 1.80641300  | -0.46907400 |
| H | 0.73222600  | 0.51167100  | -1.92593600 |

## INT21

|   |             |             |             |
|---|-------------|-------------|-------------|
| N | -0.67493800 | 1.18652600  | -0.00006200 |
| C | -1.03914700 | -0.05301200 | 0.00025700  |
| N | 0.70824500  | 1.11156800  | 0.00097500  |
| C | 1.17712000  | -0.15761500 | -0.00002100 |
| N | 0.01636200  | -0.91291800 | -0.00047800 |
| H | 1.26629500  | 1.95140800  | -0.00285300 |
| O | 2.33821000  | -0.55988700 | -0.00030300 |
| H | -2.90481100 | 0.21296000  | -0.00162200 |
| O | -2.27710900 | -0.52441600 | -0.00007300 |
| H | -0.02580800 | -1.92241800 | 0.00302600  |

## INT22

|   |             |             |             |
|---|-------------|-------------|-------------|
| N | -0.68952400 | 1.21002300  | 0.00001000  |
| C | -1.14048200 | -0.12072000 | -0.00006200 |
| N | 0.61854000  | 1.12158300  | 0.00002000  |
| C | 1.11224900  | -0.19459400 | 0.00006300  |
| N | -0.03046200 | -0.94455500 | -0.00057200 |
| H | 1.20401800  | 1.94985500  | -0.00037000 |
| O | 2.27193300  | -0.52463200 | 0.00019500  |
| O | -2.30557900 | -0.45188900 | 0.00021900  |
| H | -0.05532900 | -1.95516400 | 0.00084800  |

TS(INT21+HO<sub>2</sub>\*→INT23)

|   |             |             |             |
|---|-------------|-------------|-------------|
| N | -0.35581600 | -0.64718300 | 1.21300300  |
| C | -0.76833100 | -0.65461800 | -0.06889300 |
| N | 0.94121900  | -0.32621200 | 1.13010000  |
| C | 1.42115300  | -0.25981500 | -0.16698700 |
| N | 0.30397200  | -0.55595100 | -0.91612500 |
| H | 1.49348500  | -0.17835300 | 1.96460100  |
| O | 2.55142900  | -0.01186400 | -0.53432900 |
| O | -0.39059300 | 2.05530200  | 0.06569300  |
| O | -1.44416000 | 1.18625600  | -0.04792900 |
| H | -0.02682900 | 2.13350900  | -0.83088300 |
| H | 0.25608500  | -0.50004100 | -1.92465800 |
| O | -1.88492900 | -1.22694700 | -0.48672700 |
| H | -2.51928700 | -1.28508200 | 0.24370500  |

## INT23

|   |             |             |             |
|---|-------------|-------------|-------------|
| N | -0.17202600 | -0.42808200 | 1.27282400  |
| C | -0.70384000 | -0.44440600 | -0.08773200 |
| N | 1.11345900  | -0.14624300 | 1.12833000  |
| C | 1.53433400  | 0.03935200  | -0.19369300 |
| N | 0.40569800  | -0.14021600 | -0.92343700 |
| H | 1.72787000  | -0.08335100 | 1.93061600  |
| O | 2.66192500  | 0.30060000  | -0.55222400 |
| O | -1.30463800 | 1.77283000  | 0.16377000  |
| O | -1.77023300 | 0.49196400  | -0.21090800 |
| H | -1.09857800 | 2.18563200  | -0.68916100 |
| H | 0.36695100  | -0.10374800 | -1.93195600 |
| O | -1.27098600 | -1.65051100 | -0.42579500 |
| H | -1.93766300 | -1.88548600 | 0.23628400  |

TS(INT21+HO<sub>2</sub><sup>•</sup>→INT24)

|   |             |             |             |
|---|-------------|-------------|-------------|
| N | -1.35006200 | 0.85167100  | -0.78442600 |
| C | -1.42437600 | -0.18368600 | 0.08753200  |
| N | -0.10448100 | 1.25135400  | -0.70563900 |
| C | 0.76523100  | 0.50186000  | 0.28750600  |
| N | -0.30683300 | -0.43567200 | 0.72173600  |
| H | 0.19065800  | 2.09051700  | -1.19413900 |
| O | 1.34843400  | 1.20857300  | 1.14997700  |
| O | 1.72696700  | -0.23080100 | -0.57460100 |
| O | 1.60142900  | -1.63738500 | -0.49394600 |
| H | 2.24618800  | -1.87348200 | 0.18950700  |
| H | -0.17635600 | -1.16824400 | 1.40656400  |
| O | -2.51914600 | -0.85564700 | 0.29185600  |
| H | -3.23745200 | -0.50723300 | -0.26013800 |

## INT24

|   |             |             |             |
|---|-------------|-------------|-------------|
| N | 1.10850300  | -0.26759700 | -1.18077500 |
| C | 1.40142300  | -0.01087200 | 0.12108000  |
| N | -0.17260200 | -0.53675900 | -1.17990500 |
| C | -0.84895100 | -0.53859000 | 0.17836600  |
| N | 0.37939100  | -0.11661300 | 0.93023900  |
| H | -0.62455200 | -0.84929300 | -2.03307800 |
| O | -1.43234300 | -1.59985800 | 0.52812500  |
| O | -1.79437800 | 0.55589900  | 0.19471500  |
| O | -1.19718700 | 1.76292600  | -0.24811400 |
| H | -0.93755000 | 2.19605000  | 0.57899300  |
| H | 0.41982800  | -0.03669700 | 1.93818800  |
| O | 2.59962000  | 0.29661800  | 0.52061200  |
| H | 3.21470500  | 0.30880600  | -0.23039100 |

## TS(INT21→INT25)

|   |             |             |             |
|---|-------------|-------------|-------------|
| N | -0.47007200 | -0.71650800 | 0.05954200  |
| C | -0.42802700 | 0.60920000  | 0.03253300  |
| N | 0.84646400  | -1.14349300 | -0.02516400 |
| C | 1.71158400  | -0.10199700 | -0.01344800 |
| N | 0.89052000  | 1.00861800  | -0.01480900 |
| H | 1.21772900  | 1.96360400  | -0.03476100 |
| H | 1.08825700  | -2.10083100 | 0.18183900  |
| O | 2.94129800  | -0.12769000 | -0.01263100 |
| H | -2.58349700 | 0.33081200  | -0.04236400 |
| O | -1.43749100 | 1.37507900  | 0.03054000  |

|   |             |             |             |
|---|-------------|-------------|-------------|
| H | -1.86626800 | -1.06363800 | -0.05872600 |
| O | -2.88062300 | -0.65951000 | -0.13441600 |
| H | -3.41142100 | -0.91652400 | 0.63457100  |

## INT25

|   |             |             |             |
|---|-------------|-------------|-------------|
| N | 0.69099100  | 1.10485500  | -0.00029200 |
| C | 1.14717600  | -0.16717800 | 0.00030600  |
| N | -0.69081600 | 1.10471400  | -0.00172500 |
| C | -1.14728600 | -0.16700600 | -0.00019900 |
| N | 0.00001000  | -0.94114600 | -0.00024400 |
| H | -0.00023400 | -1.95095500 | -0.00163600 |
| H | -1.22556300 | 1.96025200  | 0.00481200  |
| O | -2.30910200 | -0.55263800 | 0.00044800  |
| H | 1.22603600  | 1.96024400  | 0.00217900  |
| O | 2.30899300  | -0.55278700 | 0.00078000  |

TS(INT22+HO<sub>2</sub>\*→INT26)

|   |             |             |             |
|---|-------------|-------------|-------------|
| N | -1.53832200 | 0.91927700  | -0.59416600 |
| C | -1.60182200 | -0.33258700 | 0.03979300  |
| N | -0.31700100 | 1.35514400  | -0.37040300 |
| C | 0.53520800  | 0.41427200  | 0.30079800  |
| N | -0.37790300 | -0.59976200 | 0.60352100  |
| H | 0.00476600  | 2.24005100  | -0.74491100 |
| O | 1.40408600  | 0.84587300  | 1.17785300  |
| O | 1.57716200  | -0.00795900 | -0.74374800 |
| O | 2.01401100  | -1.28871300 | -0.45826900 |
| H | 2.96740300  | -1.16983600 | -0.31644800 |
| H | -0.14827300 | -1.42552200 | 1.13772900  |
| O | -2.59421300 | -1.03137800 | 0.07509300  |

## INT26

|   |             |             |             |
|---|-------------|-------------|-------------|
| N | -1.52373000 | 1.02848000  | -0.44841000 |
| C | -1.60833100 | -0.41386200 | 0.01241200  |
| N | -0.36860200 | 1.36465500  | -0.32027500 |
| C | 0.64981200  | 0.24724700  | 0.35613300  |
| N | -0.39884800 | -0.77440500 | 0.42173900  |
| H | -0.08884600 | 2.32688000  | -0.55512200 |
| O | 1.22431700  | 0.59939400  | 1.39120300  |
| O | 1.45158800  | 0.05655800  | -0.82502500 |
| O | 2.36613500  | -0.98357100 | -0.53687700 |
| H | 3.07785500  | -0.52733600 | -0.06106800 |
| H | -0.22916600 | -1.65845800 | 0.88369500  |
| O | -2.66334800 | -0.98144300 | -0.03557000 |

TS(INT22+HO<sub>2</sub>\*→INT27)

|   |             |             |             |
|---|-------------|-------------|-------------|
| N | 1.42708200  | 0.87669300  | -0.55094900 |
| C | 1.56747400  | -0.36980500 | 0.07664600  |
| N | 0.24620100  | 1.44857500  | -0.39303500 |
| C | -0.53806400 | 0.45556700  | 0.29170700  |
| N | 0.34462700  | -0.58639400 | 0.63443100  |
| H | 2.18723300  | 1.36677500  | -1.00762000 |
| O | -1.42890100 | 0.87167300  | 1.15989200  |
| O | -1.57015500 | 0.00728800  | -0.77167400 |
| O | -2.01857900 | -1.26752800 | -0.47186800 |
| H | -2.96597200 | -1.13657700 | -0.30475400 |
| H | 0.08443600  | -1.41425600 | 1.15129600  |

|   |            |             |            |
|---|------------|-------------|------------|
| O | 2.56669400 | -1.04926300 | 0.09837900 |
|---|------------|-------------|------------|

## INT27

|   |             |             |             |
|---|-------------|-------------|-------------|
| N | 1.39260300  | 0.96589500  | -0.44241400 |
| C | 1.56282500  | -0.46689300 | 0.04894500  |
| N | 0.27224000  | 1.42419400  | -0.39277300 |
| C | -0.64025400 | 0.33821900  | 0.30145000  |
| N | 0.33719600  | -0.77388200 | 0.41627200  |
| H | 2.19189300  | 1.51406900  | -0.78782800 |
| O | -1.17512100 | 0.74896800  | 1.35491700  |
| O | -1.50283400 | 0.06826200  | -0.82434100 |
| O | -2.30467800 | -1.04171700 | -0.46935300 |
| H | -3.04930000 | -0.63562300 | 0.00075100  |
| H | 0.11530300  | -1.62917200 | 0.90875800  |
| O | 2.63168400  | -0.99934900 | 0.02732100  |

## TS(INT22→INT10+INT28)

|   |             |             |             |
|---|-------------|-------------|-------------|
| N | 1.05859500  | 1.15355600  | -0.02057700 |
| C | 1.21368400  | -0.14862300 | -0.02120600 |
| N | -0.18167100 | 1.58981900  | 0.07506300  |
| C | -1.41998100 | -0.55433500 | 0.02747300  |
| N | -0.24581300 | -0.96145300 | 0.16540400  |
| H | -0.13303600 | 2.60970800  | 0.07378300  |
| O | -2.48994500 | -0.19588200 | -0.14191500 |
| O | 2.12300100  | -0.91813000 | -0.10928100 |
| H | -0.11140800 | -1.95331700 | 0.35895600  |

## INT28

|   |             |             |             |
|---|-------------|-------------|-------------|
| N | -0.54379800 | 0.37174600  | 0.00001700  |
| C | 0.62815500  | 0.02656200  | -0.00001200 |
| N | -1.68180300 | -0.32443400 | 0.00000600  |
| H | -2.41647300 | 0.38907600  | -0.00008100 |
| O | 1.77834300  | -0.10995300 | -0.00000100 |

TS(NTOa\*+HO<sub>2</sub>\*→INT1a)

|   |             |             |             |
|---|-------------|-------------|-------------|
| N | -0.31054100 | -1.14450800 | 0.84115600  |
| C | -0.76650100 | -0.22226400 | -0.09864900 |
| N | 0.96744300  | -1.24782700 | 0.52011700  |
| C | 1.33416900  | -0.29883600 | -0.47990900 |
| N | 0.12232600  | 0.27146700  | -0.91865000 |
| H | 1.61573100  | -1.75045300 | 1.11454700  |
| O | 2.25794900  | -0.63375900 | -1.35300100 |
| N | -2.10523100 | 0.11264500  | -0.12963200 |
| O | -2.89919300 | -0.45814000 | 0.69984500  |
| O | -2.51684700 | 0.97938300  | -0.98159800 |
| O | 2.18616900  | 0.87437400  | 0.26099100  |
| O | 1.39644700  | 1.34851300  | 1.28509600  |
| H | 0.86407900  | 2.05164600  | 0.87520100  |

TS(NTOa\*+HO<sub>2</sub>\*→INT2a)

|   |             |             |             |
|---|-------------|-------------|-------------|
| N | 0.18689400  | 0.10930300  | 1.35251300  |
| C | -0.37358900 | -0.12928400 | 0.07144400  |
| N | 1.47095300  | -0.14841300 | 1.15274000  |
| C | 1.74805000  | -0.65693800 | -0.11002400 |
| N | 0.51692000  | -0.74618800 | -0.78961400 |
| H | 2.15072100  | -0.00841000 | 1.89184700  |



|   |             |             |             |
|---|-------------|-------------|-------------|
| O | 2.82596600  | -0.98407100 | -0.54477300 |
| N | -1.72427700 | -0.55431800 | 0.04392500  |
| O | -2.48198900 | -0.16619700 | 1.01006400  |
| O | -2.20284500 | -0.94372900 | -1.08793000 |
| O | 0.52424900  | 2.21622100  | -0.31146000 |
| O | -0.49890200 | 1.36353700  | -0.67805600 |
| H | 1.11725600  | 2.21698200  | -1.08007900 |
